# Supplementary material for: The role of services and capital in footprint modelling
Source: Springer Nature journal article supplement (doi:10.1007/s11367-019-01687-7), 2019-11-08
Supplement: MOESM1 [file 17369210]

## Sheet: Contents
	Manuscript title:	The role of services and capital in footprint modelling
	Author:	David Font Vivanco
	Date:	2019-01-18
	Sheet number	Sheet name	Description
	1	Exiobase flags	Various flags (ones and zeroes) for EXIOBASE sectors: missing service in ecoinvent, primary, secondary, and tertiary industries
	2	ISIC-EXIOBASE concordance	Concordance between ISIC classes and EXIOBASE industries
	3	Geographical concordance	Geographical concordance between Ecoinvent and EXIOBASE
	4	Hybrid LCA	Full results for the hybrid LCA case study

## Sheet: 1. EXIOBASE flags
Industry	Missing service in ecoinvent	Primary	Secondary	Tertiary
Cultivation of paddy rice	0	1	0	0
Cultivation of wheat	0	1	0	0
Cultivation of cereal grains nec	0	1	0	0
Cultivation of vegetables, fruit, nuts	0	1	0	0
Cultivation of oil seeds	0	1	0	0
Cultivation of sugar cane, sugar beet	0	1	0	0
Cultivation of plant-based fibers	0	1	0	0
Cultivation of crops nec	0	1	0	0
Cattle farming	0	1	0	0
Pigs farming	0	1	0	0
Poultry farming	0	1	0	0
Meat animals nec	0	1	0	0
Animal products nec	0	1	0	0
Raw milk	0	1	0	0
Wool, silk-worm cocoons	0	1	0	0
Manure treatment (conventional), storage and land application	0	1	0	0
Manure treatment (biogas), storage and land application	0	1	0	0
Forestry, logging and related service activities (02)	0	1	0	0
Fishing, operating of fish hatcheries and fish farms; service activities incidental to fishing (05)	0	1	0	0
Mining of coal and lignite; extraction of peat (10)	0	1	0	0
Extraction of crude petroleum and services related to crude oil extraction, excluding surveying	0	1	0	0
Extraction of natural gas and services related to natural gas extraction, excluding surveying	0	1	0	0
Extraction, liquefaction, and regasification of other petroleum and gaseous materials	0	1	0	0
Mining of uranium and thorium ores (12)	0	1	0	0
Mining of iron ores	0	1	0	0
Mining of copper ores and concentrates	0	1	0	0
Mining of nickel ores and concentrates	0	1	0	0
Mining of aluminium ores and concentrates	0	1	0	0
Mining of precious metal ores and concentrates	0	1	0	0
Mining of lead, zinc and tin ores and concentrates	0	1	0	0
Mining of other non-ferrous metal ores and concentrates	0	1	0	0
Quarrying of stone	0	1	0	0
Quarrying of sand and clay	0	1	0	0
Mining of chemical and fertilizer minerals, production of salt, other mining and quarrying n.e.c.	0	1	0	0
Processing of meat cattle	0	0	1	0
Processing of meat pigs	0	0	1	0
Processing of meat poultry	0	0	1	0
Production of meat products nec	0	0	1	0
Processing vegetable oils and fats	0	0	1	0
Processing of dairy products	0	0	1	0
Processed rice	0	0	1	0
Sugar refining	0	0	1	0
Processing of Food products nec	0	0	1	0
Manufacture of beverages	0	0	1	0
Manufacture of fish products	0	0	1	0
Manufacture of tobacco products (16)	0	0	1	0
Manufacture of textiles (17)	0	0	1	0
Manufacture of wearing apparel; dressing and dyeing of fur (18)	0	0	1	0
Tanning and dressing of leather; manufacture of luggage, handbags, saddlery, harness and footwear (19)	0	0	1	0
Manufacture of wood and of products of wood and cork, except furniture; manufacture of articles of straw and plaiting materials (20)	0	0	1	0
Re-processing of secondary wood material into new wood material	0	0	1	0
Pulp	0	0	1	0
Re-processing of secondary paper into new pulp	0	0	1	0
Paper	0	0	1	0
Publishing, printing and reproduction of recorded media (22)	0	0	1	0
Manufacture of coke oven products	0	0	1	0
Petroleum Refinery	0	0	1	0
Processing of nuclear fuel	0	0	1	0
Plastics, basic	0	0	1	0
Re-processing of secondary plastic into new plastic	0	0	1	0
N-fertiliser	0	0	1	0
P- and other fertiliser	0	0	1	0
Chemicals nec	0	0	1	0
Manufacture of rubber and plastic products (25)	0	0	1	0
Manufacture of glass and glass products	0	0	1	0
Re-processing of secondary glass into new glass	0	0	1	0
Manufacture of ceramic goods	0	0	1	0
Manufacture of bricks, tiles and construction products, in baked clay	0	0	1	0
Manufacture of cement, lime and plaster	0	0	1	0
Re-processing of ash into clinker	0	0	1	0
Manufacture of other non-metallic mineral products n.e.c.	0	0	1	0
Manufacture of basic iron and steel and of ferro-alloys and first products thereof	0	0	1	0
Re-processing of secondary steel into new steel	0	0	1	0
Precious metals production	0	0	1	0
Re-processing of secondary preciuos metals into new preciuos metals	0	0	1	0
Aluminium production	0	0	1	0
Re-processing of secondary aluminium into new aluminium	0	0	1	0
Lead, zinc and tin production	0	0	1	0
Re-processing of secondary lead into new lead, zinc and tin	0	0	1	0
Copper production	0	0	1	0
Re-processing of secondary copper into new copper	0	0	1	0
Other non-ferrous metal production	0	0	1	0
Re-processing of secondary other non-ferrous metals into new other non-ferrous metals	0	0	1	0
Casting of metals	0	0	1	0
Manufacture of fabricated metal products, except machinery and equipment (28)	0	0	1	0
Manufacture of machinery and equipment n.e.c. (29)	0	0	1	0
Manufacture of office machinery and computers (30)	0	0	1	0
Manufacture of electrical machinery and apparatus n.e.c. (31)	0	0	1	0
Manufacture of radio, television and communication equipment and apparatus (32)	0	0	1	0
Manufacture of medical, precision and optical instruments, watches and clocks (33)	0	0	1	0
Manufacture of motor vehicles, trailers and semi-trailers (34)	0	0	1	0
Manufacture of other transport equipment (35)	0	0	1	0
Manufacture of furniture; manufacturing n.e.c. (36)	0	0	1	0
Recycling of waste and scrap	0	0	1	0
Recycling of bottles by direct reuse	0	0	1	0
Production of electricity by coal	0	0	1	0
Production of electricity by gas	0	0	1	0
Production of electricity by nuclear	0	0	1	0
Production of electricity by hydro	0	0	1	0
Production of electricity by wind	0	0	1	0
Production of electricity by petroleum and other oil derivatives	0	0	1	0
Production of electricity by biomass and waste	0	0	1	0
Production of electricity by solar photovoltaic	0	0	1	0
Production of electricity by solar thermal	0	0	1	0
Production of electricity by tide, wave, ocean	0	0	1	0
Production of electricity by Geothermal	0	0	1	0
Production of electricity nec	0	0	1	0
Transmission of electricity	0	0	0	1
Distribution and trade of electricity	0	0	0	1
Manufacture of gas; distribution of gaseous fuels through mains	0	0	0	1
Steam and hot water supply	0	0	0	1
Collection, purification and distribution of water (41)	0	0	0	1
Construction (45)	0	0	0	1
Re-processing of secondary construction material into aggregates	0	0	0	1
Sale, maintenance, repair of motor vehicles, motor vehicles parts, motorcycles, motor cycles parts and accessoiries	0	0	0	1
Retail sale of automotive fuel	0	0	0	1
Wholesale trade and commission trade, except of motor vehicles and motorcycles (51)	1	0	0	1
Retail trade, except of motor vehicles and motorcycles; repair of personal and household goods (52)	1	0	0	1
Hotels and restaurants (55)	1	0	0	1
Transport via railways	0	0	0	1
Other land transport	0	0	0	1
Transport via pipelines	0	0	0	1
Sea and coastal water transport	0	0	0	1
Inland water transport	0	0	0	1
Air transport (62)	0	0	0	1
Supporting and auxiliary transport activities; activities of travel agencies (63)	1	0	0	1
Post and telecommunications (64)	0	0	0	1
Financial intermediation, except insurance and pension funding (65)	1	0	0	1
Insurance and pension funding, except compulsory social security (66)	1	0	0	1
Activities auxiliary to financial intermediation (67)	1	0	0	1
Real estate activities (70)	0	0	0	1
Renting of machinery and equipment without operator and of personal and household goods (71)	1	0	0	1
Computer and related activities (72)	1	0	0	1
Research and development (73)	1	0	0	1
Other business activities (74)	0	0	0	1
Public administration and defence; compulsory social security (75)	1	0	0	1
Education (80)	1	0	0	1
Health and social work (85)	1	0	0	1
Incineration of waste: Food	0	0	0	1
Incineration of waste: Paper	0	0	0	1
Incineration of waste: Plastic	0	0	0	1
Incineration of waste: Metals and Inert materials	0	0	0	1
Incineration of waste: Textiles	0	0	0	1
Incineration of waste: Wood	0	0	0	1
Incineration of waste: Oil/Hazardous waste	0	0	0	1
Biogasification of food waste, incl. land application	0	0	0	1
Biogasification of paper, incl. land application	0	0	0	1
Biogasification of sewage slugde, incl. land application	0	0	0	1
Composting of food waste, incl. land application	0	0	0	1
Composting of paper and wood, incl. land application	0	0	0	1
Waste water treatment, food	0	0	0	1
Waste water treatment, other	0	0	0	1
Landfill of waste: Food	0	0	0	1
Landfill of waste: Paper	0	0	0	1
Landfill of waste: Plastic	0	0	0	1
Landfill of waste: Inert/metal/hazardous	0	0	0	1
Landfill of waste: Textiles	0	0	0	1
Landfill of waste: Wood	0	0	0	1
Activities of membership organisation n.e.c. (91)	1	0	0	1
Recreational, cultural and sporting activities (92)	1	0	0	1
Other service activities (93)	0	0	0	1
Private households with employed persons (95)	0	0	0	1
Extra-territorial organizations and bodies	1	0	0	1

## Sheet: 2. ISIC-EXIOBASE concordance
classification Id (ecoinvent)	ISIC classification Name (ecoinvent)	Exiobase industry 1	Exiobase industry 2	Exiobase industry 3	Exiobase industry 4	Exiobase industry 5	Exiobase industry 6	Exiobase industry 7	Exiobase industry 8	Exiobase industry 9	Exiobase industry 10	Exiobase industry 11	Exiobase industry 12	Exiobase industry 13	Exiobase industry 14	Exiobase industry 15	Exiobase industry 16	Exiobase industry 17	Exiobase industry 18	Exiobase industry 19	Exiobase industry 20	Exiobase industry 21	Exiobase industry 22	Exiobase industry 23	Exiobase industry 24	Exiobase industry 25	Exiobase industry 26	Exiobase industry 27	Exiobase industry 28	Exiobase industry 29	Exiobase industry 30	Exiobase industry 31	Exiobase industry 32	Exiobase industry 33	Exiobase industry 34	Exiobase industry 35	Exiobase industry 36	Exiobase industry 37	Exiobase industry 38	Exiobase industry 39	Exiobase industry 40	Exiobase industry 41	Exiobase industry 42	Exiobase industry 43	Exiobase industry 44	Exiobase industry 45	Exiobase industry 46	Exiobase industry 47	Exiobase industry 48
d51f6df8-cf2c-4b9d-bffc-fe3faa398122	01:Crop and animal production, hunting and related service activities	Cultivation of cereal grains nec	Cultivation of paddy rice	Cultivation of vegetables, fruit, nuts	Cultivation of sugar cane, sugar beet	Cultivation of crops nec	Cultivation of plant-based fibers	Cattle farming	Meat animals nec	Pigs farming	Poultry farming	Animal products nec
f0b72d3d-d1be-4a3d-bb16-27b528cfd614	011:Growing of non-perennial crops	Cultivation of cereal grains nec	Cultivation of paddy rice	Cultivation of vegetables, fruit, nuts	Cultivation of sugar cane, sugar beet	Cultivation of crops nec	Cultivation of plant-based fibers
e2e1f67d-3393-4182-86f6-1ada2f77c3e5	0111:Growing of cereals (except rice), leguminous crops and oil seeds	Cultivation of cereal grains nec
a2cfa5cb-7e0a-4b16-88d6-75bececda629	0112:Growing of rice	Cultivation of paddy rice
70f60468-408c-443d-8737-73b65b804f9a	0113:Growing of vegetables and melons, roots and tubers	Cultivation of vegetables, fruit, nuts
808872a5-0570-4f88-a433-2300da42dae1	0114:Growing of sugar cane	Cultivation of sugar cane, sugar beet
5493f490-6189-429f-b0d7-f26c038ca1c2	0115:Growing of tobacco	Cultivation of crops nec
8f4689ed-c3b8-436e-bb91-364624d93144	0116:Growing of fibre crops	Cultivation of plant-based fibers
52d7089b-97f1-451f-848b-4a64911c84d4	0119:Growing of other non-perennial crops	Cultivation of crops nec
4a6b84a4-5918-4632-ad78-e2c0c69c0274	012:Growing of perennial crops	Cultivation of vegetables, fruit, nuts	Cultivation of crops nec
864e0bac-6e39-48c5-a119-bff74f5ee82c	0121:Growing of grapes	Cultivation of vegetables, fruit, nuts
d52420ed-011d-490e-a64e-0b05a0181f1b	0122:Growing of tropical and subtropical fruits	Cultivation of vegetables, fruit, nuts
562d396f-b27d-437b-b69f-3bfe87fcd737	0123:Growing of citrus fruits	Cultivation of vegetables, fruit, nuts
698316f5-3629-4e39-b4c7-65ad332319db	0124:Growing of pome fruits and stone fruits	Cultivation of vegetables, fruit, nuts
0f1a113f-cb80-46ad-9385-ef4bf9c82e7e	0125:Growing of other tree and bush fruits and nuts	Cultivation of vegetables, fruit, nuts
6885b734-ad0c-4618-8fd5-44ae94604e11	0126:Growing of oleaginous fruits	Cultivation of vegetables, fruit, nuts
f135ca7f-3df4-4218-a04e-2e9b02f2ebe7	0127:Growing of beverage crops	Cultivation of crops nec
3165acc1-d5a5-47b1-983a-b4e074f876c5	0128:Growing of spices, aromatic, drug and pharmaceutical crops	Cultivation of crops nec
27499c25-05ef-4f63-93c4-c1734a52c64e	0129:Growing of other perennial crops	Cultivation of crops nec
73f9f9ce-f9bd-4387-bbc1-e1287a54ee9a	013:Plant propagation	Cultivation of crops nec
890a4180-9426-49f0-a088-b0ff3aaf8f27	0130:Plant propagation	Cultivation of crops nec
38b98781-598c-4791-8b41-d9c15c039016	014:Animal production	Cattle farming	Meat animals nec	Pigs farming	Poultry farming
01c46aed-f5d1-4428-8f0a-52a590cfa278	0141:Raising of cattle and buffaloes	Cattle farming
f5c450a9-f96f-4d5c-bc47-9917dc13fb43	0142:Raising of horses and other equines	Meat animals nec
25fba606-c173-4727-b3da-0482d158fc01	0143:Raising of camels and camelids	Meat animals nec
a7ffabe6-a6b9-4f72-a8a7-bafaa219406f	0144:Raising of sheep and goats	Meat animals nec
4cc1385d-e1c8-44e0-a8fa-284d16442787	0145:Raising of swine/pigs	Pigs farming
f59d2975-3046-4dde-8cb9-887b4b9908e1	0146:Raising of poultry	Poultry farming
50551742-2521-4c30-8b8c-9dd460790cfb	0149:Raising of other animals	Meat animals nec
975f7960-2647-46fd-8fe5-a1efc313edc3	015:Mixed farming	Animal products nec
f91ce0d0-b072-4016-b4f7-862fe6313c14	0150:Mixed farming	Animal products nec
4473eebe-d87a-43a7-b253-7c77b425f3c2	016:Support activities to agriculture and post-harvest crop activities	Cultivation of crops nec
bbe2eb06-fac9-48bb-9610-f402b9d3f2d0	0161:Support activities for crop production	Cultivation of crops nec	Animal products nec
172f4d11-46f4-43f2-a49e-eae5e66dd79f	0162:Support activities for animal production	Animal products nec
2fbefa76-b10b-4120-9966-682ad1b66329	0163:Post-harvest crop activities	Cultivation of crops nec
0b990b98-9c52-4932-837c-3e9f680f3afc	0164:Seed processing for propagation	Cultivation of crops nec
b35768cb-9741-4b5c-8b82-6a1374462917	017:Hunting, trapping and related service activities	Animal products nec
daeb058d-2b85-4918-86d9-d95272d6edab	0170:Hunting, trapping and related service activities	Animal products nec
e5db3257-7cac-4232-a049-eabf29122bf4	02:Forestry and logging	Forestry, logging and related service activities (02)
189b4b3d-c1a9-4192-b021-8298cb4f5999	021:Silviculture and other forestry activities	Forestry, logging and related service activities (02)
6c31832b-67aa-4b6a-b4ce-23aa4fe64a59	0210:Silviculture and other forestry activities	Forestry, logging and related service activities (02)
465500d5-922b-4a98-b4d1-8fdd44a42343	022:Logging	Forestry, logging and related service activities (02)
30e36ded-b8a3-4eb1-b5f5-edbe571c8c29	0220:Logging	Forestry, logging and related service activities (02)
ac6da42a-64fd-41be-823f-4aeffb0f29b7	023:Gathering of non-wood forest products	Forestry, logging and related service activities (02)
3e174aa1-0f01-4267-a84d-fa211a90dc7f	0230:Gathering of non-wood forest products	Forestry, logging and related service activities (02)
7a6e7c2b-91ec-4e6e-8286-774ee80457bd	024:Support services to forestry	Forestry, logging and related service activities (02)
7ffd4d9c-353b-43b2-a757-86bfb03ddd07	0240:Support services to forestry	Forestry, logging and related service activities (02)
38dfca1a-12a8-4f25-bbba-5b26bc91dd36	03:Fishing and aquaculture	Fishing, operating of fish hatcheries and fish farms; service activities incidental to fishing (05)
14e53271-df50-4f96-b7d4-913ebd93cbc9	031:Fishing	Fishing, operating of fish hatcheries and fish farms; service activities incidental to fishing (05)
2fc70895-91b4-48a7-a362-8b22623ba3a4	0311:Marine fishing	Fishing, operating of fish hatcheries and fish farms; service activities incidental to fishing (05)
c35782c6-5dea-4c8d-a3fe-18eaa0291333	0312:Freshwater fishing	Fishing, operating of fish hatcheries and fish farms; service activities incidental to fishing (05)
531ed94a-0916-4088-a658-da554fd28c1c	032:Aquaculture	Fishing, operating of fish hatcheries and fish farms; service activities incidental to fishing (05)
962142c3-6a32-40a7-adc3-87c8cdc4e7ff	0321:Marine aquaculture	Fishing, operating of fish hatcheries and fish farms; service activities incidental to fishing (05)
21f37422-1275-4557-a409-b62632bb1eb5	0322:Freshwater aquaculture	Fishing, operating of fish hatcheries and fish farms; service activities incidental to fishing (05)
15bf16fa-7967-40ab-8ac2-b705c686e77d	05:Mining of coal and lignite	Mining of coal and lignite; extraction of peat (10)
31322c48-c668-465b-8896-2a2ae1ccd557	051:Mining of hard coal	Mining of coal and lignite; extraction of peat (10)
fe48499d-c72b-4865-9c01-fb8daff5fccd	0510:Mining of hard coal	Mining of coal and lignite; extraction of peat (10)
45e5109b-2e52-4364-9c9c-aea5c5e39fdb	052:Mining of lignite	Mining of coal and lignite; extraction of peat (10)
42f319b5-ebdd-4d65-8718-a4ea63de6ede	0520:Mining of lignite	Mining of coal and lignite; extraction of peat (10)
ae94b54e-3d5e-4eb3-8c07-449b50bd1cee	06:Extraction of crude petroleum and natural gas	Extraction of crude petroleum and services related to crude oil extraction, excluding surveying	Extraction of natural gas and services related to natural gas extraction, excluding surveying
71c0174a-c4e8-47d3-b7f5-73ca0432d96e	061:Extraction of crude petroleum	Extraction of crude petroleum and services related to crude oil extraction, excluding surveying
2f9c7d9a-60ea-4418-a794-eedc1a8de829	0610:Extraction of crude petroleum	Extraction of crude petroleum and services related to crude oil extraction, excluding surveying
064ab097-b54c-410e-be97-ecd5771cb2ca	062:Extraction of natural gas	Extraction of natural gas and services related to natural gas extraction, excluding surveying
5985aa1a-764f-4f61-9c21-bcdff1aefb7d	0620:Extraction of natural gas	Extraction of natural gas and services related to natural gas extraction, excluding surveying
4a2b883c-01ab-4861-94fc-f79358933922	07:Mining of metal ores	Mining of iron ores	Mining of uranium and thorium ores (12)	Mining of other non-ferrous metal ores and concentrates
0dfc7a01-6b2f-4025-ad6a-d01d8b865354	071:Mining of iron ores	Mining of iron ores
01b19d6a-4ae0-40cd-842e-8bef220702b6	0710:Mining of iron ores	Mining of iron ores
5dc717de-26f0-411b-9f43-2607ad8a0863	072:Mining of non-ferrous metal ores	Mining of uranium and thorium ores (12)
3cfe2a2a-de46-41f4-a74d-4591b8c720c8	0721:Mining of uranium and thorium ores	Mining of uranium and thorium ores (12)	Mining of other non-ferrous metal ores and concentrates
c0fc337b-4b42-4a91-a61b-516092e0bf8e	0729:Mining of other non-ferrous metal ores	Mining of other non-ferrous metal ores and concentrates
62706f87-94f5-4eb4-a9dc-5816de5a0dc3	08:Other mining and quarrying	Quarrying of stone
9413f9bd-6f69-48f3-bdfd-47794da756ec	081:Quarrying of stone, sand and clay	Quarrying of stone	Mining of chemical and fertilizer minerals, production of salt, other mining and quarrying n.e.c.
1569ef79-3c08-4e08-b908-a839ed48976c	0810:Quarrying of stone, sand and clay	Quarrying of stone	Quarrying of sand and clay
ccf0ca14-80c3-4d34-9301-36ed855e8493	089:Mining and quarrying n.e.c.	Mining of chemical and fertilizer minerals, production of salt, other mining and quarrying n.e.c.
322d69ab-3e6a-483c-94fb-3d4d650fa7ed	0891:Mining of chemical and fertilizer minerals	Mining of chemical and fertilizer minerals, production of salt, other mining and quarrying n.e.c.
beeda552-2933-4ba8-965b-7b7e88d97511	0892:Extraction of peat	Mining of chemical and fertilizer minerals, production of salt, other mining and quarrying n.e.c.
91897a60-b8fd-4504-9b8d-6af8df1b8a5f	0893:Extraction of salt	Mining of chemical and fertilizer minerals, production of salt, other mining and quarrying n.e.c.
79ab5073-0f6c-46ac-89e9-cfffa6032087	0899:Other mining and quarrying n.e.c.	Mining of chemical and fertilizer minerals, production of salt, other mining and quarrying n.e.c.
b4391732-e9c7-4b32-a265-3f6bec21baa5	09:Mining support service activities	Extraction of crude petroleum and services related to crude oil extraction, excluding surveying	Mining of chemical and fertilizer minerals, production of salt, other mining and quarrying n.e.c.	Extraction of natural gas and services related to natural gas extraction, excluding surveying
fd4e7a63-4560-4284-8801-0e740a1e2c12	091:Support activities for petroleum and natural gas extraction	Extraction of crude petroleum and services related to crude oil extraction, excluding surveying	Extraction of natural gas and services related to natural gas extraction, excluding surveying
8d4f4273-9dc7-449b-a116-9e10259070ea	0910:Support activities for petroleum and natural gas extraction	Extraction of crude petroleum and services related to crude oil extraction, excluding surveying	Extraction of natural gas and services related to natural gas extraction, excluding surveying
b2cadc8e-c50b-48cc-88b9-a646bbc72f6b	099:Support activities for other mining and quarrying	Mining of chemical and fertilizer minerals, production of salt, other mining and quarrying n.e.c.
1330953c-78b1-4350-8c9b-f56282078fb9	0990:Support activities for other mining and quarrying	Mining of chemical and fertilizer minerals, production of salt, other mining and quarrying n.e.c.
162fbec3-b8e6-4559-9ba3-11f5ed19f7a6	10:Manufacture of food products	Processing of meat cattle	Manufacture of fish products	Processing of Food products nec	Processing vegetable oils and fats	Processing of dairy products	Sugar refining
aa2210a8-9733-4513-9022-1277d5accea0	101:Processing and preserving of meat	Processing of meat cattle
0c446550-80b2-4304-93f9-a555ab0ef7c9	1010:Processing and preserving of meat	Processing of meat cattle
5290a3b7-75a9-472f-acaf-2e981f4ac871	102:Processing and preserving of fish, crustaceans and molluscs	Manufacture of fish products
fb9a6a31-ef0a-4542-ab6c-67487f4f196f	1020:Processing and preserving of fish, crustaceans and molluscs	Manufacture of fish products
28305118-aba0-4325-b85d-110de6b49fa0	103:Processing and preserving of fruit and vegetables	Processing of Food products nec
7ccf5f14-de30-47ed-ad5e-bdd7f205b965	1030:Processing and preserving of fruit and vegetables	Processing of Food products nec
a652f015-bd70-4d6e-9190-78c91c572be2	104:Manufacture of vegetable and animal oils and fats	Processing vegetable oils and fats
b871f6a1-7cb3-4498-8a68-fee57ec52520	1040:Manufacture of vegetable and animal oils and fats	Processing vegetable oils and fats
019f3bcc-4956-4e95-9db3-ae24a3b9ba6c	105:Manufacture of dairy products	Processing of dairy products
0d72613e-17e0-4e29-882d-f11a84167ccf	1050:Manufacture of dairy products	Processing of dairy products
342394b8-9070-4bb2-b009-8599cd2d9847	106:Manufacture of grain mill products, starches and starch products	Processing of Food products nec
27a07d1b-169e-4985-85ad-f660f8053c88	1061:Manufacture of grain mill products	Processing of Food products nec
b16f14a4-7c17-4969-a5b6-16c4ebbe1af7	1062:Manufacture of starches and starch products	Processing of Food products nec
bc627a3f-31ce-4b42-8a91-18c73efe4372	107:Manufacture of other food products	Processing of Food products nec
e34f6701-d087-4902-b024-368b15a20b22	1071:Manufacture of bakery products	Processing of Food products nec
9ace646e-c525-485f-9a38-83141d126718	1072:Manufacture of sugar	Sugar refining
d1099763-6c97-4a47-90f2-b6d20475ac7e	1073:Manufacture of cocoa, chocolate and sugar confectionery	Processing of Food products nec
04a2ed78-435a-49bb-a36e-1c9a142b7f75	1074:Manufacture of macaroni, noodles, couscous and similar farinaceous products	Processing of Food products nec
26798f66-7a87-4d6e-8d34-1bd748c36ea6	1075:Manufacture of prepared meals and dishes	Processing of Food products nec
bcdab23b-5390-4d5d-9851-4cc65e19899f	1079:Manufacture of other food products n.e.c.	Processing of Food products nec
e99b6cb6-a848-4921-b5eb-dc290c2f44c7	108:Manufacture of prepared animal feeds	Processing of Food products nec
09da95e3-b171-49a6-93c1-4f6b933500e8	1080:Manufacture of prepared animal feeds	Processing of Food products nec
ca6eb4bd-a733-4d47-a92b-ac49c8e401d2	11:Manufacture of beverages	Manufacture of beverages
15187fcf-972c-4886-b8d4-8da3c6428b19	110:Manufacture of beverages	Manufacture of beverages
02d1bc8b-84fe-4a93-a761-645ad19c1685	1101:Distilling, rectifying and blending of spirits	Manufacture of beverages
8c641b66-db2b-4f3d-bb5c-bc639960fa74	1102:Manufacture of wines	Manufacture of beverages
3cb50f2d-c9f9-49c6-8fcd-757990a5c925	1103:Manufacture of malt liquors and malt	Manufacture of beverages
8cfa3e81-4aac-4960-950e-46ac8a789a83	1104:Manufacture of soft drinks; production of mineral waters and other bottled	Manufacture of beverages
bc4e5583-d4fe-4cc9-9185-0186681deb2a	12:Manufacture of tobacco products	Manufacture of tobacco products (16)
6275758f-f899-4343-91c1-0237f636290d	120:Manufacture of tobacco products	Manufacture of tobacco products (16)
7336b5a4-24ac-4335-bffe-518599c76122	1200:Manufacture of tobacco products	Manufacture of tobacco products (16)
a4ba9f33-966c-429f-8f26-4c061950f7f2	13:Manufacture of textiles	Manufacture of textiles (17)
f3c8ba14-4559-46fb-ab73-45f0eee3ce28	131:Spinning, weaving and finishing of textiles	Manufacture of textiles (17)
57576906-1fe0-4105-b904-91f03d66057f	1311:Preparation and spinning of textile fibres	Manufacture of textiles (17)
cf187d09-9033-4ef5-9ff1-0db820644b58	1312:Weaving of textiles	Manufacture of textiles (17)
14181512-75f0-4c44-8bea-6245e2f21484	1313:Finishing of textiles	Manufacture of textiles (17)
5f754f23-3c81-420e-a937-1b1797e71781	139:Manufacture of other textiles	Manufacture of textiles (17)
e308e709-f433-4e37-878e-485d92c51678	1391:Manufacture of knitted and crocheted fabrics	Manufacture of textiles (17)
a5b70df8-9a28-4642-bc23-927a1919bc8c	1392:Manufacture of made-up textile articles, except apparel	Manufacture of textiles (17)
d06f015c-e7bd-48d6-a28d-29a8301776db	1393:Manufacture of carpets and rugs	Manufacture of textiles (17)
3be42819-b40d-4393-98d1-435589306866	1394:Manufacture of cordage, rope, twine and netting	Manufacture of textiles (17)
2f391c50-0882-4633-aeb3-73cb3c8de009	1399:Manufacture of other textiles n.e.c.	Manufacture of textiles (17)
4e63fb2c-9afd-4427-8893-1d89e2b36c57	14:Manufacture of wearing apparel	Manufacture of wearing apparel; dressing and dyeing of fur (18)
4962398f-2fce-4db4-9361-9ae94cfecf49	141:Manufacture of wearing apparel, except fur apparel	Manufacture of wearing apparel; dressing and dyeing of fur (18)
a108002d-7935-4aa1-a698-9a95e4b421e6	1410:Manufacture of wearing apparel, except fur apparel	Manufacture of wearing apparel; dressing and dyeing of fur (18)
0bcd87d5-d27d-4218-baba-4fe1ad21c790	142:Manufacture of articles of fur	Manufacture of wearing apparel; dressing and dyeing of fur (18)
2b299ed6-b663-404b-bcc0-8ff7c393f1c5	1420:Manufacture of articles of fur	Manufacture of wearing apparel; dressing and dyeing of fur (18)
ccc892d3-b30b-41ff-92eb-71ea270ba4f6	143:Manufacture of knitted and crocheted apparel	Manufacture of wearing apparel; dressing and dyeing of fur (18)
9261e881-fb20-4c3a-ab54-03a8656f2329	1430:Manufacture of knitted and crocheted apparel	Manufacture of wearing apparel; dressing and dyeing of fur (18)
be32b64f-8a15-4711-b4a4-bca24c72b7f3	15:Manufacture of leather and related products	Tanning and dressing of leather; manufacture of luggage, handbags, saddlery, harness and footwear (19)
5eec83d3-66c2-4894-a8d2-a35a3585342d	151:Tanning and dressing of leather; manufacture of luggage, handbags, saddlery	Tanning and dressing of leather; manufacture of luggage, handbags, saddlery, harness and footwear (19)
c43cae4f-e44c-4421-8e79-26b67eecc3e2	1511:Tanning and dressing of leather; dressing and dyeing of fur	Tanning and dressing of leather; manufacture of luggage, handbags, saddlery, harness and footwear (19)
afb2b136-a2c0-402b-83b6-08e106267df2	1512:Manufacture of luggage, handbags and the like, saddlery and harness	Tanning and dressing of leather; manufacture of luggage, handbags, saddlery, harness and footwear (19)
feaaefac-8bd3-4ae2-b7b5-8a1304aea2dc	152:Manufacture of footwear	Tanning and dressing of leather; manufacture of luggage, handbags, saddlery, harness and footwear (19)
8c8e218e-f9aa-46d4-a3e3-d0e0900b2aab	1520:Manufacture of footwear	Tanning and dressing of leather; manufacture of luggage, handbags, saddlery, harness and footwear (19)
e5b11ea9-e6ed-401f-b47f-c3bd561c303d	16:Manufacture of wood and of products of wood and cork, except furniture; manuf	Manufacture of wood and of products of wood and cork, except furniture; manufacture of articles of straw and plaiting materials (20)
25439a9e-5578-4ff2-b441-9aa36311a6f9	161:Sawmilling and planing of wood	Manufacture of wood and of products of wood and cork, except furniture; manufacture of articles of straw and plaiting materials (20)
45e0d63f-f176-49f2-a053-8033c5f89e77	1610:Sawmilling and planing of wood	Manufacture of wood and of products of wood and cork, except furniture; manufacture of articles of straw and plaiting materials (20)
627be0b2-04e5-4179-b1eb-98755b9dda04	162:Manufacture of products of wood, cork, straw and plaiting materials	Manufacture of wood and of products of wood and cork, except furniture; manufacture of articles of straw and plaiting materials (20)
4f0398fe-506c-443d-ac87-b441d11fa122	1621:Manufacture of veneer sheets and wood-based panels	Manufacture of wood and of products of wood and cork, except furniture; manufacture of articles of straw and plaiting materials (20)
d1c0a2c9-5b2d-48b0-935a-6e720ed2d70e	1622:Manufacture of builders' carpentry and joinery	Manufacture of wood and of products of wood and cork, except furniture; manufacture of articles of straw and plaiting materials (20)
e712ff56-0021-4f5b-be28-921fb551ad54	1623:Manufacture of wooden containers	Manufacture of wood and of products of wood and cork, except furniture; manufacture of articles of straw and plaiting materials (20)
0aa2f712-8853-4f63-ba25-e5bc5dd38a98	1629:Manufacture of other products of wood; manufacture of articles of cork, str	Manufacture of wood and of products of wood and cork, except furniture; manufacture of articles of straw and plaiting materials (20)
3bc82d25-1544-464c-aeb6-48996a7a8455	17:Manufacture of paper and paper products	Paper
e0ddd566-d513-4ced-9f14-5aebd8bdfaf1	170:Manufacture of paper and paper products	Paper
fb3058cc-84a5-4eee-92b2-3ba721dea538	1701:Manufacture of pulp, paper and paperboard	Paper
5682ee05-067a-4dd3-a2b5-93f3f1d25c75	1702:Manufacture of corrugated paper and paperboard and of containers of paper a	Paper
00ee7628-01fb-448c-8141-5a7d0c258c14	1709:Manufacture of other articles of paper and paperboard	Paper
07c50b01-f1ed-4e92-8d87-5fef4b01a8bc	18:Printing and reproduction of recorded media	Publishing, printing and reproduction of recorded media (22)
01529f20-5044-423d-b7d5-65d8336f256a	181:Printing and service activities related to printing	Publishing, printing and reproduction of recorded media (22)
1fccd383-60db-4a4b-9d7a-b6f126ef5a76	1811:Printing	Publishing, printing and reproduction of recorded media (22)
422ab221-89ee-441f-8973-179e5f0f3ea9	1812:Service activities related to printing	Publishing, printing and reproduction of recorded media (22)
be33dec4-b7b7-40c4-9807-2d0548ec99fb	182:Reproduction of recorded media	Publishing, printing and reproduction of recorded media (22)
9e9a6abe-b21b-45c2-b9ed-7c03a5e81b83	1820:Reproduction of recorded media	Publishing, printing and reproduction of recorded media (22)
73d0b202-208a-4f4b-bae5-b84318c1da7f	19:Manufacture of coke and refined petroleum products	Manufacture of coke oven products	Petroleum Refinery	Manufacture of gas; distribution of gaseous fuels through mains
8fe1e40c-d528-4eeb-88fc-b93bba5a59e2	191:Manufacture of coke oven products	Manufacture of coke oven products
3aa0f2c5-1d26-4f98-8c2c-7406d4b7f2ae	1910:Manufacture of coke oven products	Manufacture of coke oven products
857f3fe4-537b-42d0-977c-80231d5aa7b1	192:Manufacture of refined petroleum products	Petroleum Refinery
0bef4135-5b56-4012-a812-b78c9a8218a9	1920:Manufacture of refined petroleum products	Petroleum Refinery
4f107d89-2796-4fdc-846f-42db0485de80	19a: Liquid and gaseous fuels from biomass	Manufacture of gas; distribution of gaseous fuels through mains
97cb61b4-f165-4227-831a-0df604658946	20:Manufacture of chemicals and chemical products	Chemicals nec	Processing of nuclear fuel	N-fertiliser	Plastics, basic	Manufacture of furniture; manufacturing n.e.c. (36)	P- and other fertiliser
3ea4048a-988d-47c6-8ed3-d03b456305ba	201:Manufacture of basic chemicals, fertilizers and nitrogen compounds, plastics	Chemicals nec	Processing of nuclear fuel	N-fertiliser	P- and other fertiliser	Plastics, basic
28f738cc-bb73-48f8-b633-f83fb9bc5ddc	2011:Manufacture of basic chemicals	Chemicals nec
146e59a6-42c3-40bf-bb71-cce6fb20df6d	2011a: Manufacture of nuclear fuels	Processing of nuclear fuel
04d83550-7c85-44f3-916b-424730a81963	2012:Manufacture of fertilizers and nitrogen compounds	N-fertiliser	P- and other fertiliser
4a11cbd4-74bf-47fb-9fe5-6e97e3db136b	2013:Manufacture of plastics and synthetic rubber in primary forms	Plastics, basic
8714dc59-0b7b-4e7a-8227-e639051eb6e1	202:Manufacture of other chemical products	Chemicals nec
8a45a80b-336f-4a04-95fb-1a1be360d2d3	2021:Manufacture of pesticides and other agrochemical products	Chemicals nec
653b6f22-d18a-4585-9e60-be2dae051299	2022:Manufacture of paints, varnishes and similar coatings, printing ink and mas	Chemicals nec
68009ca2-60ee-4d5c-a36d-125adbe838a7	2023:Manufacture of soap and detergents, cleaning and polishing preparations, pe	Chemicals nec
49e37174-49ec-45f8-bcbf-3220772406a2	2029:Manufacture of other chemical products n.e.c.	Chemicals nec
6169706c-367f-428b-a87a-abe28f4550fe	203:Manufacture of man-made fibres	Manufacture of furniture; manufacturing n.e.c. (36)
89f1fee3-adf1-450e-bfcc-282376ffb46a	2030:Manufacture of man-made fibres	Manufacture of furniture; manufacturing n.e.c. (36)
cb4c8a08-54e8-4797-a900-2d4469ea30c9	21:Manufacture of basic pharmaceutical products and pharmaceutical preparations	Manufacture of furniture; manufacturing n.e.c. (36)
1d0b78e4-c5f9-4f02-81e4-1320be214d40	210:Manufacture of pharmaceuticals, medicinal chemical and botanical products	Manufacture of furniture; manufacturing n.e.c. (36)
639df68d-ce83-4cc4-8c97-af68527f0bf8	2100:Manufacture of pharmaceuticals, medicinal chemical and botanical products	Manufacture of furniture; manufacturing n.e.c. (36)
820f3074-cdf3-4343-9a67-4b33992cc7e9	22:Manufacture of rubber and plastics products	Manufacture of rubber and plastic products (25)
0d5ae8b2-286c-4ec9-a1a7-8049feb7be87	221:Manufacture of rubber products	Manufacture of rubber and plastic products (25)
b2d33443-29e8-4a41-899f-3b2b3ddc458c	2211:Manufacture of rubber tyres and tubes; retreading and rebuilding of rubber	Manufacture of rubber and plastic products (25)
e05dcfa5-a50d-4dc8-8174-29b8fdc163e4	2219:Manufacture of other rubber products	Manufacture of rubber and plastic products (25)
60f10f38-2b11-45e1-8542-fdfeacad871b	222:Manufacture of plastics products	Manufacture of rubber and plastic products (25)
14363e31-908b-4e16-a794-638f2affef72	2220:Manufacture of plastics products	Manufacture of rubber and plastic products (25)
01256ef2-49fc-4a7b-9a32-a2af90af8355	23:Manufacture of other non-metallic mineral products	Manufacture of glass and glass products	Manufacture of other non-metallic mineral products n.e.c.	Manufacture of bricks, tiles and construction products, in baked clay	Manufacture of ceramic goods	Manufacture of cement, lime and plaster
2873e3cc-e919-4f07-81b7-fb2539009a64	231:Manufacture of glass and glass products	Manufacture of glass and glass products
045c67ac-55a6-47c5-81b6-714eb8607939	2310:Manufacture of glass and glass products	Manufacture of glass and glass products
8561dfe4-c9a0-4582-a7a2-90576f098bca	239:Manufacture of non-metallic mineral products n.e.c.	Manufacture of other non-metallic mineral products n.e.c.	Manufacture of bricks, tiles and construction products, in baked clay	Manufacture of ceramic goods	Manufacture of cement, lime and plaster
8b5914d7-56fe-452c-83bd-7b6345a57f63	2391:Manufacture of refractory products	Manufacture of other non-metallic mineral products n.e.c.
a5071d0a-6e4e-4fb6-a98b-940902b9a3c9	2392:Manufacture of clay building materials	Manufacture of bricks, tiles and construction products, in baked clay
d45058a5-04c6-40c3-9fb8-40c7e8f43fdd	2393:Manufacture of other porcelain and ceramic products	Manufacture of ceramic goods
36cd730c-4485-4fe9-8efe-8850f771796d	2394:Manufacture of cement, lime and plaster	Manufacture of cement, lime and plaster
27f6acbc-2350-450e-9762-1ce00e12ecba	2395:Manufacture of articles of concrete, cement and plaster	Manufacture of other non-metallic mineral products n.e.c.
4efeec95-f665-4ce4-a099-0d9980a8bef3	2396:Cutting, shaping and finishing of stone	Manufacture of other non-metallic mineral products n.e.c.
072976da-35f1-4afe-bad1-dbb458efcd1e	2399:Manufacture of other non-metallic mineral products n.e.c.	Manufacture of other non-metallic mineral products n.e.c.
8980edb1-32cb-4205-a28b-1eab2da55975	24:Manufacture of basic metals	Manufacture of basic iron and steel and of ferro-alloys and first products thereof	Precious metals production	Processing of nuclear fuel	Casting of metals	Other non-ferrous metal production
98b4dfa6-729e-4396-b6e3-c7084bd9edf4	241:Manufacture of basic iron and steel	Manufacture of basic iron and steel and of ferro-alloys and first products thereof
7516220e-6e84-4408-bf33-0d6b63444c86	2410:Manufacture of basic iron and steel	Manufacture of basic iron and steel and of ferro-alloys and first products thereof
56e2d368-6848-43d0-9e13-056e632314a3	242:Manufacture of basic precious and other non-ferrous metals	Precious metals production	Other non-ferrous metal production	Processing of nuclear fuel
6fe7bc2b-4be4-48f7-92b0-f27dea9053ce	2420:Manufacture of basic precious and other non-ferrous metals	Precious metals production	Other non-ferrous metal production
fa55800a-0dfe-42b3-ab19-021f296c8281	2420a: Smelting and refining of uranium	Processing of nuclear fuel
81798da1-62d1-4d5c-a0d6-ac5a3fac520c	243:Casting of metals	Casting of metals
d770a066-d158-4232-b096-466afa957656	2431:Casting of iron and steel	Casting of metals
626058ef-449c-4d53-913d-8701c89127ef	2432:Casting of non-ferrous metals	Casting of metals
b0aef80c-272e-4a80-bab4-018983708961	25:Manufacture of fabricated metal products, except machinery and equipment	Manufacture of fabricated metal products, except machinery and equipment (28)	Manufacture of furniture; manufacturing n.e.c. (36)	Manufacture of machinery and equipment n.e.c. (29)
4c78997e-1035-43ab-8ca2-3f100960b5a1	251:Manufacture of structural metal products, tanks, reservoirs and steam genera	Manufacture of fabricated metal products, except machinery and equipment (28)
20ba4f22-afa7-42d0-b76f-eb13853169b4	2511:Manufacture of structural metal products	Manufacture of fabricated metal products, except machinery and equipment (28)
a746916c-f942-41e2-a267-f7b3a83d9bd8	2512:Manufacture of tanks, reservoirs and containers of metal	Manufacture of fabricated metal products, except machinery and equipment (28)
209749a0-e38f-4491-835b-2c6eda118cec	2513:Manufacture of steam generators, except central heating hot water boilers	Manufacture of fabricated metal products, except machinery and equipment (28)
2cfcdc94-c2a1-48e0-b17c-7413766236e7	252:Manufacture of weapons and ammunition	Manufacture of furniture; manufacturing n.e.c. (36)
1699ec5e-599d-4b65-9c4f-a08fac752ed9	2520:Manufacture of weapons and ammunition	Manufacture of furniture; manufacturing n.e.c. (36)
c5c39a11-8860-4d18-98b8-7d627e3b89fc	259:Manufacture of other fabricated metal products; metalworking service activit	Manufacture of fabricated metal products, except machinery and equipment (28)	Manufacture of machinery and equipment n.e.c. (29)
46fcb93a-53b7-4be7-8211-a8dbee17a009	2591:Forging, pressing, stamping and roll-forming of metal; powder metallurgy	Manufacture of fabricated metal products, except machinery and equipment (28)
873e2688-4fb3-4acb-bfaf-1b99b3dca83d	2592:Treatment and coating of metals; machining	Manufacture of fabricated metal products, except machinery and equipment (28)
5fa09b50-bd51-463e-8048-bcfb478b1e85	2593:Manufacture of cutlery, hand tools and general hardware	Manufacture of machinery and equipment n.e.c. (29)
c9fae7df-d70c-4963-98b5-4eea25ceb727	2599:Manufacture of other fabricated metal products n.e.c.	Manufacture of fabricated metal products, except machinery and equipment (28)
210d941d-49a0-4fa3-a560-36e001b8d18f	26:Manufacture of computer, electronic and optical products	Manufacture of office machinery and computers (30)	Manufacture of radio, television and communication equipment and apparatus (32)	Manufacture of medical, precision and optical instruments, watches and clocks (33)
4dba99a9-7e69-44cc-8018-9ad44f70b6d7	261:Manufacture of electronic components and boards	Manufacture of office machinery and computers (30)
49f4c661-1394-4116-a572-ea9b4d04b235	2610:Manufacture of electronic components and boards	Manufacture of office machinery and computers (30)
2cce0a11-fb4e-4b04-bb76-91b454b2f781	262:Manufacture of computers and peripheral equipment	Manufacture of office machinery and computers (30)
f4a849f3-9172-404c-9834-37fae8cda5ff	2620:Manufacture of computers and peripheral equipment	Manufacture of office machinery and computers (30)
c8ada55a-8ead-4cb3-946f-6f81e70e3a36	263:Manufacture of communication equipment	Manufacture of radio, television and communication equipment and apparatus (32)
04b5cecf-67f2-45b7-9524-897083f0c831	2630:Manufacture of communication equipment	Manufacture of radio, television and communication equipment and apparatus (32)
43429646-9fe5-4e27-97f2-d43420d54942	264:Manufacture of consumer electronics	Manufacture of radio, television and communication equipment and apparatus (32)
f829fd8f-f9f2-4cfc-b10e-a97f1c633d61	2640:Manufacture of consumer electronics	Manufacture of radio, television and communication equipment and apparatus (32)
5f0b3fc0-20f3-4ada-b690-21c2a9b4ab7e	265:Manufacture of measuring, testing, navigating and control equipment; watches	Manufacture of medical, precision and optical instruments, watches and clocks (33)
82367e94-fae9-4c8c-9ca6-3dcad2562a79	2651:Manufacture of measuring, testing, navigating and control equipment	Manufacture of medical, precision and optical instruments, watches and clocks (33)
acb1b715-5ae6-40ca-9c4a-88536ecf7879	2652:Manufacture of watches and clocks	Manufacture of medical, precision and optical instruments, watches and clocks (33)
31306131-ebaa-46b5-a614-34c1edcea24b	266:Manufacture of irradiation, electromedical and electrotherapeutic equipment	Manufacture of medical, precision and optical instruments, watches and clocks (33)
b5955948-d7c0-4830-bc29-c19b29faad29	2660:Manufacture of irradiation, electromedical and electrotherapeutic equipment	Manufacture of medical, precision and optical instruments, watches and clocks (33)
8acd74f6-904a-4377-bf12-ab98f4f4bd7c	267:Manufacture of optical instruments and photographic equipment	Manufacture of medical, precision and optical instruments, watches and clocks (33)
bb01a5a3-44a0-4c08-8365-23a0a8b192cb	2670:Manufacture of optical instruments and photographic equipment	Manufacture of medical, precision and optical instruments, watches and clocks (33)
2e975fde-e7b9-4bb3-b116-fa2adbfe95de	268:Manufacture of magnetic and optical media	Manufacture of medical, precision and optical instruments, watches and clocks (33)
8ebc97a6-bc9b-4294-953d-53cd0092cab7	2680:Manufacture of magnetic and optical media	Manufacture of medical, precision and optical instruments, watches and clocks (33)
dd05c8f2-be18-4d9f-bbb3-ecdfe041a1f8	27:Manufacture of electrical equipment	Manufacture of electrical machinery and apparatus n.e.c. (31)
24cccce7-aae3-4f90-99b4-1dbab49be2a9	271:Manufacture of electric motors, generators, transformers and electricity dis	Manufacture of electrical machinery and apparatus n.e.c. (31)
4064a80b-0844-4755-a5d4-d732cc78cc5c	2710:Manufacture of electric motors, generators, transformers and electricity di	Manufacture of electrical machinery and apparatus n.e.c. (31)
d5104756-8b60-4521-97b8-2eddd7e0339f	2710a: Manufacture of electric motors, generators, for liquid fuels	Manufacture of electrical machinery and apparatus n.e.c. (31)
5e49f40b-03e0-44b7-a578-0f5c57409e66	272:Manufacture of batteries and accumulators	Manufacture of electrical machinery and apparatus n.e.c. (31)
d993cd6e-fa74-4867-9531-d24fb75d5089	2720:Manufacture of batteries and accumulators	Manufacture of electrical machinery and apparatus n.e.c. (31)
43b62fac-91ce-469d-9a89-823686ed1c24	273:Manufacture of wiring and wiring devices	Manufacture of electrical machinery and apparatus n.e.c. (31)
ea73c92d-2174-4142-a044-bad535b4b442	2731:Manufacture of fibre optic cables	Manufacture of electrical machinery and apparatus n.e.c. (31)
04b5300e-0ac0-4711-9810-b52d3f2830f6	2732:Manufacture of other electronic and electric wires and cables	Manufacture of electrical machinery and apparatus n.e.c. (31)
fe059bf0-4191-47b6-91c3-3e734bda99ef	2733:Manufacture of wiring devices	Manufacture of electrical machinery and apparatus n.e.c. (31)
8f5f4b71-77f8-406f-a4f4-b7d20f1ba4a0	274:Manufacture of electric lighting equipment	Manufacture of electrical machinery and apparatus n.e.c. (31)
f1f2bb97-5781-490e-9fd2-1dfbd7932b48	2740:Manufacture of electric lighting equipment	Manufacture of electrical machinery and apparatus n.e.c. (31)
18596192-7a25-4bcf-9baf-8548ebf56994	275:Manufacture of domestic appliances	Manufacture of electrical machinery and apparatus n.e.c. (31)
ec08744a-ac2b-418a-8840-dc6b416df9ad	2750:Manufacture of domestic appliances	Manufacture of electrical machinery and apparatus n.e.c. (31)
ef763d53-dd2a-4d1a-b6ee-57a46d244f0d	279:Manufacture of other electrical equipment	Manufacture of electrical machinery and apparatus n.e.c. (31)
af350670-f4bc-4b99-a1be-c4710646270c	2790:Manufacture of other electrical equipment	Manufacture of electrical machinery and apparatus n.e.c. (31)
7664dc76-e066-44ef-bd66-e4a6f1d0c9a3	28:Manufacture of machinery and equipment n.e.c.	Manufacture of machinery and equipment n.e.c. (29)
fcf3ada8-21f2-4877-a5bd-9d858033128c	281:Manufacture of general-purpose machinery	Manufacture of machinery and equipment n.e.c. (29)
95e9a845-7367-4775-8ed4-249bb0588193	2811:Manufacture of engines and turbines, except aircraft, vehicle and cycle eng	Manufacture of machinery and equipment n.e.c. (29)
b203c33c-0669-47e6-b2ba-aefdddf80a1d	2811a: Manufacture of engines and turbines for liquid fuels, except aircraft, vehicle and cycle engines	Manufacture of machinery and equipment n.e.c. (29)
43ded126-09f3-4f19-8d20-1df99b74ee54	2812:Manufacture of fluid power equipment	Manufacture of machinery and equipment n.e.c. (29)
ab1aa231-fcc4-4779-805b-e7bf3695a2ee	2813:Manufacture of other pumps, compressors, taps and valves	Manufacture of machinery and equipment n.e.c. (29)
46c744e8-4954-4427-91cc-9e8d2c2fe697	2814:Manufacture of bearings, gears, gearing and driving elements	Manufacture of machinery and equipment n.e.c. (29)
844bb5bd-c3ab-491d-bd6b-baea2f2ba27b	2815:Manufacture of ovens, furnaces and furnace burners	Manufacture of machinery and equipment n.e.c. (29)
eca62f26-af40-4cca-a436-32f01629005d	2815a: Manufacture of furnaces and boilers for liquid fuels	Manufacture of machinery and equipment n.e.c. (29)
471c0f54-cad6-45f7-8925-4a65107fd747	2815b: Manufacture of permanent mount non-electric household heating equipment	Manufacture of machinery and equipment n.e.c. (29)
0ccb5995-8d5d-4690-bb95-86848fda3262	2816:Manufacture of lifting and handling equipment	Manufacture of machinery and equipment n.e.c. (29)
b300b042-f44d-4cf4-bf29-a87e98b9a9f8	2817:Manufacture of office machinery and equipment (except computers and periphe	Manufacture of machinery and equipment n.e.c. (29)
f03d1422-c585-4189-a0d9-40b9015d9631	2818:Manufacture of power-driven hand tools	Manufacture of machinery and equipment n.e.c. (29)
6b9cebae-0286-4343-b93b-01a84e0246d7	2819:Manufacture of other general-purpose machinery	Manufacture of machinery and equipment n.e.c. (29)
694d2759-69ab-4519-98e2-a3688bf7d823	282:Manufacture of special-purpose machinery	Manufacture of machinery and equipment n.e.c. (29)
f86226bb-b5a3-4c0b-b829-c9ce18a714de	2821:Manufacture of agricultural and forestry machinery	Manufacture of machinery and equipment n.e.c. (29)
a8939b46-4945-46ff-91ce-c9366b941526	2822:Manufacture of metal-forming machinery and machine tools	Manufacture of machinery and equipment n.e.c. (29)
6450af70-8075-4acd-8760-cc04f327ff60	2823:Manufacture of machinery for metallurgy	Manufacture of machinery and equipment n.e.c. (29)
94c3a1cb-14f7-49ed-bd10-a7044866f9fe	2824:Manufacture of machinery for mining, quarrying and construction	Manufacture of machinery and equipment n.e.c. (29)
9989417d-3c93-4c62-8199-e5b3b3731764	2825:Manufacture of machinery for food, beverage and tobacco processing	Manufacture of machinery and equipment n.e.c. (29)
24255989-3c98-4b18-839e-98bb1571c7cc	2826:Manufacture of machinery for textile, apparel and leather production	Manufacture of machinery and equipment n.e.c. (29)
83057f9a-d314-4830-a51f-901cb9c3f763	2829:Manufacture of other special-purpose machinery	Manufacture of machinery and equipment n.e.c. (29)
112b5bbb-898b-4e1f-8870-e1af0eaa4fef	29:Manufacture of motor vehicles, trailers and semi-trailers	Manufacture of motor vehicles, trailers and semi-trailers (34)
5b30c143-5902-424b-bab3-a6f2afefd9a7	291:Manufacture of motor vehicles	Manufacture of motor vehicles, trailers and semi-trailers (34)
8c080627-7417-484e-9086-c469a8114cc4	2910:Manufacture of motor vehicles	Manufacture of motor vehicles, trailers and semi-trailers (34)
aea14333-1d2c-4cee-bd8e-93bac615f500	292:Manufacture of bodies (coachwork) for motor vehicles; manufacture of trailer	Manufacture of motor vehicles, trailers and semi-trailers (34)
bcfc0c7a-9fb2-4de7-b687-23c55fc83aac	2920:Manufacture of bodies (coachwork) for motor vehicles; manufacture of traile	Manufacture of motor vehicles, trailers and semi-trailers (34)
67b56bd9-02a4-4be7-9854-2b180b699233	293:Manufacture of parts and accessories for motor vehicles	Manufacture of motor vehicles, trailers and semi-trailers (34)
e4b2ed6d-ec0a-4263-8964-ca6287fe68e1	2930:Manufacture of parts and accessories for motor vehicles	Manufacture of motor vehicles, trailers and semi-trailers (34)
7733b6d6-9b57-4663-a424-4437e1eaceb8	30:Manufacture of other transport equipment	Manufacture of other transport equipment (35)
086fb958-e752-4ea8-b403-4edda1a862b5	301:Building of ships and boats	Manufacture of other transport equipment (35)
97f14df1-6992-4723-b31b-c2c14438f4c2	3011:Building of ships and floating structures	Manufacture of other transport equipment (35)
3e9eba64-da22-42f3-a567-8421f886dba4	3011a: Construction of drilling platforms	Manufacture of other transport equipment (35)
34f4ced3-9cec-440e-bb2e-004da7276a47	3012:Building of pleasure and sporting boats	Manufacture of other transport equipment (35)
ee6337c0-2c4f-4d5c-aed9-f30ca5f9bfcd	302:Manufacture of railway locomotives and rolling stock	Manufacture of other transport equipment (35)
c4b43057-814e-44f9-a8fe-6c36d3009cfd	3020:Manufacture of railway locomotives and rolling stock	Manufacture of other transport equipment (35)
04ef0f60-7b1e-423a-ab52-af011e6f64d5	303:Manufacture of air and spacecraft and related machinery	Manufacture of other transport equipment (35)
a552e7c0-f0b1-4da2-a5b4-965cd7a61450	3030:Manufacture of air and spacecraft and related machinery	Manufacture of other transport equipment (35)
5306b4f0-e58a-4267-9861-472be1305f17	304:Manufacture of military fighting vehicles	Manufacture of other transport equipment (35)
fa61be71-7b34-46ad-9971-f85bb1cc6553	3040:Manufacture of military fighting vehicles	Manufacture of other transport equipment (35)
b6420c5c-e1bb-4f67-a5e8-5ae3d2a94c25	309:Manufacture of transport equipment n.e.c.	Manufacture of other transport equipment (35)
f7269711-1372-4f03-ba1f-edc5366839ee	3091:Manufacture of motorcycles	Manufacture of other transport equipment (35)
557911de-9ad6-4abd-9ec8-e260c2d963cf	3092:Manufacture of bicycles and invalid carriages	Manufacture of other transport equipment (35)
6efd0a34-6588-4a82-b025-da0cf6d85bf5	3099:Manufacture of other transport equipment n.e.c.	Manufacture of other transport equipment (35)
47c1e228-020a-4922-a8f6-526c283b783d	31:Manufacture of furniture	Manufacture of furniture; manufacturing n.e.c. (36)
30e53c0e-8942-4675-817b-cb08704a8436	310:Manufacture of furniture	Manufacture of furniture; manufacturing n.e.c. (36)
4ff96806-9b38-483e-b153-6ef5b7c95857	3100:Manufacture of furniture	Manufacture of furniture; manufacturing n.e.c. (36)
ed356ceb-dd77-4dfd-944c-5b53bbfedeef	32:Other manufacturing	Manufacture of furniture; manufacturing n.e.c. (36)
a352ef60-ced7-411f-a130-1c6d9a9e7ec3	321:Manufacture of jewellery, bijouterie and related articles	Manufacture of furniture; manufacturing n.e.c. (36)
eb91fd72-1c4f-4c26-a032-5efb1611e1f1	3211:Manufacture of jewellery and related articles	Manufacture of furniture; manufacturing n.e.c. (36)
e80c5043-55d7-4b7f-b49e-6460a14ad62f	3212:Manufacture of imitation jewellery and related articles	Manufacture of furniture; manufacturing n.e.c. (36)
be931643-7fba-4a25-a11f-9c97dfd6d398	322:Manufacture of musical instruments	Manufacture of furniture; manufacturing n.e.c. (36)
62198a0d-8f39-4f9c-b05b-7ec29a70c047	3220:Manufacture of musical instruments	Manufacture of furniture; manufacturing n.e.c. (36)
3789a3a4-ec50-4781-b51e-70fca6b3e8c2	323:Manufacture of sports goods	Manufacture of furniture; manufacturing n.e.c. (36)
9bbedca5-97b5-44a9-a346-cbab74bf613e	3230:Manufacture of sports goods	Manufacture of furniture; manufacturing n.e.c. (36)
62b0862f-0e2b-4b70-8e0d-48b18b119158	324:Manufacture of games and toys	Manufacture of furniture; manufacturing n.e.c. (36)
1006eda0-c802-41dc-ab81-5d6622417462	3240:Manufacture of games and toys	Manufacture of furniture; manufacturing n.e.c. (36)
72ca86ab-1069-4247-8d6b-5d38ed417d7b	325:Manufacture of medical and dental instruments and supplies	Manufacture of medical, precision and optical instruments, watches and clocks (33)
fd89bd9b-c7d1-4723-9a7e-87a345dcd46a	3250:Manufacture of medical and dental instruments and supplies	Manufacture of medical, precision and optical instruments, watches and clocks (33)
912923fe-ef8d-4e3d-bce8-117eae700802	329:Other manufacturing n.e.c.	Manufacture of furniture; manufacturing n.e.c. (36)
d8321aca-15d7-40e1-b784-e7004867c402	3290:Other manufacturing n.e.c.	Manufacture of furniture; manufacturing n.e.c. (36)
73dc8e10-f242-4838-b7c3-9d4d08f99995	33:Repair and installation of machinery and equipment	Other business activities (74)
7a65589f-b543-40e8-9dd7-c5f6040a4db4	331:Repair of fabricated metal products, machinery and equipment	Other business activities (74)
16576d24-aac9-415c-9ca9-d537044b9da8	3311:Repair of fabricated metal products	Other business activities (74)
aed80f6a-eb11-4ccb-9c54-8ddde68b11e7	3312:Repair of machinery	Other business activities (74)
5b65d7b1-2021-4104-af93-411587d8e37e	3313:Repair of electronic and optical equipment	Other business activities (74)
b8c60340-64dd-47db-b053-5113f560e093	3314:Repair of electrical equipment	Other business activities (74)
23f6551b-9ef0-4091-bf94-b3f502254976	3315:Repair of transport equipment, except motor vehicles	Other business activities (74)
ab478599-2f59-4d14-a52c-719c9f5eaa4c	3319:Repair of other equipment	Other business activities (74)
91510128-add1-4b25-9037-6845107dfeba	332:Installation of industrial machinery and equipment	Other business activities (74)
5e94e265-3225-458d-9835-e9db274e2870	3320:Installation of industrial machinery and equipment	Other business activities (74)
422da2c0-b461-4943-96f9-ed7275835b0c	35:Electricity, gas, steam and air conditioning supply	Transmission of electricity	Production of electricity by petroleum and other oil derivatives	Production of electricity by solar photovoltaic	Manufacture of gas; distribution of gaseous fuels through mains	Steam and hot water supply	Distribution and trade of electricity	Production of electricity by biomass and waste
1fea6ed6-97ab-4e6a-9637-cb2e34221d55	351:Electric power generation, transmission and distribution	Transmission of electricity	Production of electricity by petroleum and other oil derivatives	Production of electricity by solar photovoltaic	Distribution and trade of electricity	Production of electricity by biomass and waste
4c3b7870-d05d-41cf-9a2f-d901c183b0d8	3510:Electric power generation, transmission and distribution	Transmission of electricity	Distribution and trade of electricity
0f370488-0114-485f-b1b2-d7830162cda2	3510a: Electric power generation based on liquid fuels	Production of electricity by petroleum and other oil derivatives	Production of electricity by biomass and waste
14e3fbf3-99c1-469f-ae96-ffa9765e1bb2	3510b: Electric power generation, photovoltaic	Production of electricity by solar photovoltaic
5f2ea771-a9d6-4a4c-9148-58f05255d63f	352:Manufacture of gas; distribution of gaseous fuels through mains	Manufacture of gas; distribution of gaseous fuels through mains
5020424a-5b73-4722-8000-ac205dbd592d	3520:Manufacture of gas; distribution of gaseous fuels through mains	Manufacture of gas; distribution of gaseous fuels through mains
ca16761f-7ced-436d-b39a-3e59f5fbd315	353:Steam and air conditioning supply	Steam and hot water supply
be3540ee-592f-46fd-bd68-c362a3bbccc6	3530:Steam and air conditioning supply	Steam and hot water supply
eb0899ba-0651-4dbe-a0c8-21403b167faf	3530a: Steam and air conditioning supply based on liquid fuels	Steam and hot water supply
4f63093c-076b-4806-89ab-65b55b5bb03b	3530b: Solar collectors	Steam and hot water supply
7ff9653c-90de-4cd0-a030-91ff2cdf117f	36:Water collection, treatment and supply	Collection, purification and distribution of water (41)
5231e126-0927-4ea1-bc82-3177caaf01f4	360:Water collection, treatment and supply	Collection, purification and distribution of water (41)
2e230f2b-db03-4cc3-b350-5606e04d2aa0	3600:Water collection, treatment and supply	Collection, purification and distribution of water (41)
a76af610-f537-4c26-ac19-6680f14cdf70	37:Sewerage	Public administration and defence; compulsory social security (75)
6c8f6194-1f50-4b0b-b41a-96ef42119333	370:Sewerage	Public administration and defence; compulsory social security (75)
a84d0ee4-d77c-4905-b876-3ef60873c763	3700:Sewerage	Public administration and defence; compulsory social security (75)
8115fc78-0fa7-4471-8601-4135250c2b98	38:Waste collection, treatment and disposal activities; materials recovery	Public administration and defence; compulsory social security (75)	Incineration of waste: Food	Incineration of waste: Oil/Hazardous waste	Recycling of waste and scrap	Incineration of waste: Paper	Incineration of waste: Plastic	Incineration of waste: Metals and Inert materials	Incineration of waste: Textiles	Incineration of waste: Wood	Biogasification of food waste, incl. land application	Biogasification of paper, incl. land application	Biogasification of sewage slugde, incl. land application	Composting of food waste, incl. land application	Composting of paper and wood, incl. land application	Landfill of waste: Food	Landfill of waste: Paper	Landfill of waste: Plastic	Landfill of waste: Textiles	Landfill of waste: Wood	Landfill of waste: Inert/metal/hazardous	Recycling of bottles by direct reuse
bae21e5b-f0be-4d65-beba-6e6015cda646	381:Waste collection	Public administration and defence; compulsory social security (75)
c5c111f2-7555-4858-a8c4-2fe82e255c7f	3811:Collection of non-hazardous waste	Public administration and defence; compulsory social security (75)
7ccba1dc-6d7c-4795-be1c-29cf13281df6	3812:Collection of hazardous waste	Public administration and defence; compulsory social security (75)
50c36d6b-c003-4a7a-b88e-eeda9353187b	382:Waste treatment and disposal	Incineration of waste: Food	Incineration of waste: Oil/Hazardous waste	Incineration of waste: Paper	Incineration of waste: Plastic	Incineration of waste: Metals and Inert materials	Incineration of waste: Textiles	Incineration of waste: Wood	Biogasification of food waste, incl. land application	Biogasification of paper, incl. land application	Biogasification of sewage slugde, incl. land application	Composting of food waste, incl. land application	Composting of paper and wood, incl. land application	Landfill of waste: Food	Landfill of waste: Paper	Landfill of waste: Plastic	Landfill of waste: Textiles	Landfill of waste: Wood	Landfill of waste: Inert/metal/hazardous
9a63625a-358b-4c1d-bf95-50ba038a759b	3821:Treatment and disposal of non-hazardous waste	Incineration of waste: Food	Incineration of waste: Paper	Incineration of waste: Plastic	Incineration of waste: Metals and Inert materials	Incineration of waste: Textiles	Incineration of waste: Wood	Biogasification of food waste, incl. land application	Biogasification of paper, incl. land application	Biogasification of sewage slugde, incl. land application	Composting of food waste, incl. land application	Composting of paper and wood, incl. land application	Landfill of waste: Food	Landfill of waste: Paper	Landfill of waste: Plastic	Landfill of waste: Textiles	Landfill of waste: Wood
5e736d13-58c6-4fbd-8157-dd6ef35c3f88	3822:Treatment and disposal of hazardous waste	Incineration of waste: Oil/Hazardous waste	Landfill of waste: Inert/metal/hazardous
ecb6bb34-5733-4711-96ff-b62383be4758	383:Materials recovery	Recycling of waste and scrap	Recycling of bottles by direct reuse
db303709-3eac-4c8b-9ed9-7e4888240c50	3830:Materials recovery	Recycling of waste and scrap	Recycling of bottles by direct reuse
a8667ea6-f874-411d-b707-63c782bcbbd9	39:Remediation activities and other waste management services	Other business activities (74)
26d9e4bc-3629-449e-88c4-407997ddc84c	390:Remediation activities and other waste management services	Other business activities (74)
8b66bca2-6c96-40ba-af07-3c899af56e76	3900:Remediation activities and other waste management services	Other business activities (74)
4b751957-9daf-4677-be5b-5d1b19d120ce	41:Construction of buildings	Construction (45)
538be621-8ba5-4048-a6c4-b12940fd3183	410:Construction of buildings	Construction (45)
7f668b02-5461-48bd-ae18-dfec04cce529	4100:Construction of buildings	Construction (45)
43e3e2c2-e7c7-4103-89aa-2d41c98449e6	4100a: Construction of factory buildings for the metal industry	Construction (45)
e62671c5-0e31-47c3-a367-1b965de9cc35	42:Civil engineering	Construction (45)
f8ee838c-b10f-43d8-b304-0a8384dbbb15	421:Construction of roads and railways	Construction (45)
122eb40b-ec0b-4b74-b8f6-b804a1306519	4210:Construction of roads and railways	Construction (45)
78ce8b0a-a978-4739-842a-8f66e44d4613	422:Construction of utility projects	Construction (45)
252082de-7cec-4d38-a58f-2819f633c6b6	4220:Construction of utility projects	Construction (45)
c3954a05-0098-4c4c-8604-a4ac6ea2323f	4220a: Construction of utility projects for electricity production, except for liquid fuels	Construction (45)
0693d5d9-1050-4547-bff1-ae157a72f6f5	4220b: Construction of utility projects for electricity production, for liquid fuels	Construction (45)
4f820c8c-d6e4-45a0-ab79-674d86014bcf	429:Construction of other civil engineering projects	Construction (45)
d1a5808c-6d4a-4d8c-a748-b9fef65b7ed1	4290:Construction of other civil engineering projects	Construction (45)
7af79de0-2aa6-4c20-99f5-609603f546d7	4290a: Construction of infrastructure for petroleum refining and distribution	Construction (45)
e5b73886-7c44-4690-b255-fdda73165d22	43:Specialized construction activities	Construction (45)
41ee62ec-9af4-4711-949a-13139c8d08bc	431:Demolition and site preparation	Construction (45)
c849382c-86cb-4e65-8821-868766d78b1f	4311:Demolition	Construction (45)
be4c61d8-e321-413f-b505-030afee8cb9a	4312:Site preparation	Construction (45)
ac5f1d74-0746-42a2-8196-72a5e88d813e	432:Electrical, plumbing and other construction installation activities	Construction (45)
2599d2c3-0891-49a5-a80c-1add95ca3e2b	4321:Electrical installation	Construction (45)
eb4562a9-2265-4c8c-b631-f66e451705bd	4322:Plumbing, heat and air-conditioning installation	Construction (45)
7d952380-c04b-4918-9732-c39c831b2d41	4322a: Installation of solar collector systems	Construction (45)
c11744dd-1e59-4c33-a1f0-e1e41077d8da	4329:Other construction installation	Construction (45)
7c55dbff-8309-468e-8c6b-f8c2e5576772	433:Building completion and finishing	Construction (45)
3fab2496-5a27-4bd7-8253-31afdbb1d486	4330:Building completion and finishing	Construction (45)
bcf939b6-c609-4a97-8df7-1da241dc7827	439:Other specialized construction activities	Construction (45)
88ef0d81-5e89-4ea5-962f-e450f531cd70	4390:Other specialized construction activities	Construction (45)
5be28f99-feb5-4a07-86fd-0be930a8d139	45:Wholesale and retail trade and repair of motor vehicles and motorcycles	Sale, maintenance, repair of motor vehicles, motor vehicles parts, motorcycles, motor cycles parts and accessoiries
87e39185-2bc3-425f-966a-50fc3f868d0c	451:Sale of motor vehicles	Sale, maintenance, repair of motor vehicles, motor vehicles parts, motorcycles, motor cycles parts and accessoiries
69c37e71-4958-4fa1-8e6c-68ea3d4176cc	4510:Sale of motor vehicles	Sale, maintenance, repair of motor vehicles, motor vehicles parts, motorcycles, motor cycles parts and accessoiries
8d18ce40-6748-4408-9c36-5f7857ee4341	452:Maintenance and repair of motor vehicles	Sale, maintenance, repair of motor vehicles, motor vehicles parts, motorcycles, motor cycles parts and accessoiries
4627e802-3482-4895-ae5c-cab9840d551b	4520:Maintenance and repair of motor vehicles	Sale, maintenance, repair of motor vehicles, motor vehicles parts, motorcycles, motor cycles parts and accessoiries
96c51c9d-9ba9-4439-b99f-c18aa0f0f457	453:Sale of motor vehicle parts and accessories	Sale, maintenance, repair of motor vehicles, motor vehicles parts, motorcycles, motor cycles parts and accessoiries
6223e62d-867c-4515-ade1-9133338a8481	4530:Sale of motor vehicle parts and accessories	Sale, maintenance, repair of motor vehicles, motor vehicles parts, motorcycles, motor cycles parts and accessoiries
9f42fecf-81e8-4e8d-b52f-bc99b25c49ad	454:Sale, maintenance and repair of motorcycles and related parts and accessorie	Sale, maintenance, repair of motor vehicles, motor vehicles parts, motorcycles, motor cycles parts and accessoiries
0f129367-aabd-4253-845e-2a5f1cd32771	4540:Sale, maintenance and repair of motorcycles and related parts and accessori	Sale, maintenance, repair of motor vehicles, motor vehicles parts, motorcycles, motor cycles parts and accessoiries
a6851861-0dbf-4c6b-9a9e-0449b53acf90	46:Wholesale trade, except of motor vehicles and motorcycles	Wholesale trade and commission trade, except of motor vehicles and motorcycles (51)
e0d99251-70c4-4fce-af31-5f87773b725c	461:Wholesale on a fee or contract basis	Wholesale trade and commission trade, except of motor vehicles and motorcycles (51)
87e789a9-27dd-4889-b76a-248bdcf2d29e	4610:Wholesale on a fee or contract basis	Wholesale trade and commission trade, except of motor vehicles and motorcycles (51)
e4d9ce5e-5dd1-4583-a479-bf7c4c0dbbc9	462:Wholesale of agricultural raw materials and live animals	Wholesale trade and commission trade, except of motor vehicles and motorcycles (51)
ee18bd8d-8efd-40f7-bb53-66ce22466ff6	4620:Wholesale of agricultural raw materials and live animals	Wholesale trade and commission trade, except of motor vehicles and motorcycles (51)
64bfd509-fdc1-4c5d-8930-c123b69f8238	463:Wholesale of food, beverages and tobacco	Wholesale trade and commission trade, except of motor vehicles and motorcycles (51)
e6605309-0b0a-4137-b155-b1bb3d06be83	4630:Wholesale of food, beverages and tobacco	Wholesale trade and commission trade, except of motor vehicles and motorcycles (51)
371faa18-8f1f-43e3-bd03-6cae65d3ceaf	464:Wholesale of household goods	Wholesale trade and commission trade, except of motor vehicles and motorcycles (51)
db458b53-aac2-4dd8-aa99-8f5e86ea9e14	4641:Wholesale of textiles, clothing and footwear	Wholesale trade and commission trade, except of motor vehicles and motorcycles (51)
3b2d4aa9-cfc4-40bc-82f3-ba3f3cac564f	4649:Wholesale of other household goods	Wholesale trade and commission trade, except of motor vehicles and motorcycles (51)
b40d3d68-0a56-4a25-a84e-13504c42c4bf	465:Wholesale of machinery, equipment and supplies	Wholesale trade and commission trade, except of motor vehicles and motorcycles (51)
05f333bc-843d-45ae-8452-b31948f407b4	4651:Wholesale of computers, computer peripheral equipment and software	Wholesale trade and commission trade, except of motor vehicles and motorcycles (51)
8ca134a4-a341-48b8-8ed2-7fd7d6f0f7ad	4652:Wholesale of electronic and telecommunications equipment and parts	Wholesale trade and commission trade, except of motor vehicles and motorcycles (51)
a78389fe-3c09-40bd-8ae9-e48552193eee	4653:Wholesale of agricultural machinery, equipment and supplies	Wholesale trade and commission trade, except of motor vehicles and motorcycles (51)
cd20b2ff-8749-4c50-874c-2c9e91a56aac	4659:Wholesale of other machinery and equipment	Wholesale trade and commission trade, except of motor vehicles and motorcycles (51)
eae96d10-62a8-433c-8d5d-c332395170ad	466:Other specialized wholesale	Wholesale trade and commission trade, except of motor vehicles and motorcycles (51)
de9d2749-7a44-40f7-aee9-f48c95a42ed2	4661:Wholesale of solid, liquid and gaseous fuels and related products	Wholesale trade and commission trade, except of motor vehicles and motorcycles (51)
be9e05e7-9cb9-4db1-92fa-1f5a7b00d884	4662:Wholesale of metals and metal ores	Wholesale trade and commission trade, except of motor vehicles and motorcycles (51)
934d8bd3-2884-4223-80a1-833ec7148448	4663:Wholesale of construction materials, hardware, plumbing and heating equipme	Wholesale trade and commission trade, except of motor vehicles and motorcycles (51)
e1ade212-20f2-4df5-8e10-069d4adbb164	4669:Wholesale of waste and scrap and other products n.e.c.	Wholesale trade and commission trade, except of motor vehicles and motorcycles (51)
667330cf-66b2-4f68-811d-407103c94723	469:Non-specialized wholesale trade	Wholesale trade and commission trade, except of motor vehicles and motorcycles (51)
66a7a188-be8b-49f7-b109-d7a00dce7529	4690:Non-specialized wholesale trade	Wholesale trade and commission trade, except of motor vehicles and motorcycles (51)
4e730cb4-bcec-413b-b1c5-6c6ef2998192	47:Retail trade, except of motor vehicles and motorcycles	Retail trade, except of motor vehicles and motorcycles; repair of personal and household goods (52)
f5159771-16b7-422c-91e6-f59751d07de4	471:Retail sale in non-specialized stores	Retail trade, except of motor vehicles and motorcycles; repair of personal and household goods (52)
e5ab3d0d-209a-4975-99c4-8c3976f3292d	4711:Retail sale in non-specialized stores with food, beverages or tobacco predo	Retail trade, except of motor vehicles and motorcycles; repair of personal and household goods (52)
dd2aa7be-6ee5-4cf7-9b6f-d8d21af50a29	4719:Other retail sale in non-specialized stores	Retail trade, except of motor vehicles and motorcycles; repair of personal and household goods (52)
fba1f850-7c8b-408f-9979-c67fb7509587	472:Retail sale of food, beverages and tobacco in specialized stores	Retail trade, except of motor vehicles and motorcycles; repair of personal and household goods (52)
6819a9fe-25f0-47ae-a3e8-1eec2d59bb78	4721:Retail sale of food in specialized stores	Retail trade, except of motor vehicles and motorcycles; repair of personal and household goods (52)
a925b028-02a4-4458-8c99-a66d62721565	4722:Retail sale of beverages in specialized stores	Retail trade, except of motor vehicles and motorcycles; repair of personal and household goods (52)
4da181d7-81cf-47eb-83d6-9174c052bb31	4723:Retail sale of tobacco products in specialized stores	Retail trade, except of motor vehicles and motorcycles; repair of personal and household goods (52)
0a7788a0-7f92-4357-a771-090a4594424d	473:Retail sale of automotive fuel in specialized stores	Retail trade, except of motor vehicles and motorcycles; repair of personal and household goods (52)
82f89e30-edd1-4a3f-b656-b7a4cca6cbab	4730:Retail sale of automotive fuel in specialized stores	Retail trade, except of motor vehicles and motorcycles; repair of personal and household goods (52)
a58ba680-cb84-4107-8837-b277c0333d76	474:Retail sale of information and communications equipment in specialized store	Retail trade, except of motor vehicles and motorcycles; repair of personal and household goods (52)
1f21b3ad-0baa-46b1-8b15-3592b0e873f4	4741:Retail sale of computers, peripheral units, software and telecommunications	Retail trade, except of motor vehicles and motorcycles; repair of personal and household goods (52)
295a5ca7-e13a-474a-be2f-dfabd34abd23	4742:Retail sale of audio and video equipment in specialized stores	Retail trade, except of motor vehicles and motorcycles; repair of personal and household goods (52)
41dd8d1a-f55d-41bc-817d-3f09a53651ae	475:Retail sale of other household equipment in specialized stores	Retail trade, except of motor vehicles and motorcycles; repair of personal and household goods (52)
e6fa10d5-8e2c-490a-90ee-bcdf56957ee9	4751:Retail sale of textiles in specialized stores	Retail trade, except of motor vehicles and motorcycles; repair of personal and household goods (52)
2bafcf35-7782-457c-acd9-c61a0f035297	4752:Retail sale of hardware, paints and glass in specialized stores	Retail trade, except of motor vehicles and motorcycles; repair of personal and household goods (52)
dd1f6683-5021-4e6c-891c-ae38246f3726	4753:Retail sale of carpets, rugs, wall and floor coverings in specialized store	Retail trade, except of motor vehicles and motorcycles; repair of personal and household goods (52)
49a7a7bb-a461-419d-92d8-9da7610a62a7	4759:Retail sale of electrical household appliances, furniture, lighting equipme	Retail trade, except of motor vehicles and motorcycles; repair of personal and household goods (52)
7b17f77d-aac1-4f94-b0de-b593cd2dd40e	476:Retail sale of cultural and recreation goods in specialized stores	Retail trade, except of motor vehicles and motorcycles; repair of personal and household goods (52)
569a6632-913e-425c-b3d9-dd43e39628c7	4761:Retail sale of books, newspapers and stationary in specialized stores	Retail trade, except of motor vehicles and motorcycles; repair of personal and household goods (52)
ceed9651-fbc7-4bb7-b9d9-30fc21b13c0a	4762:Retail sale of music and video recordings in specialized stores	Retail trade, except of motor vehicles and motorcycles; repair of personal and household goods (52)
477f7175-25b2-4aea-b27f-264ab59841d4	4763:Retail sale of sporting equipment in specialized stores	Retail trade, except of motor vehicles and motorcycles; repair of personal and household goods (52)
a2cd03ca-db6f-4537-82c1-9b1b90cf2b29	4764:Retail sale of games and toys in specialized stores	Retail trade, except of motor vehicles and motorcycles; repair of personal and household goods (52)
9c9d96f5-5a31-4f53-b1c2-201cb01a5d1a	477:Retail sale of other goods in specialized stores	Retail trade, except of motor vehicles and motorcycles; repair of personal and household goods (52)
61c90fa5-1165-400d-b60d-9e58bb3fd05c	4771:Retail sale of clothing, footwear and leather articles in specialized store	Retail trade, except of motor vehicles and motorcycles; repair of personal and household goods (52)
ea9ad168-c35a-4e29-b3ed-0ba2309a2877	4772:Retail sale of pharmaceutical and medical goods, cosmetic and toilet articl	Retail trade, except of motor vehicles and motorcycles; repair of personal and household goods (52)
281377bb-8f21-46ef-af54-325ec7decf23	4773:Other retail sale of new goods in specialized stores	Retail trade, except of motor vehicles and motorcycles; repair of personal and household goods (52)
8a0b0db7-61d8-40aa-9d81-6e0718ac3b98	4774:Retail sale of second-hand goods	Retail trade, except of motor vehicles and motorcycles; repair of personal and household goods (52)
983cc3f1-04f8-484a-a806-6230c93ae82b	478:Retail sale via stalls and markets	Retail trade, except of motor vehicles and motorcycles; repair of personal and household goods (52)
f8f50159-0ee9-43f8-9465-eeb37bd3b216	4781:Retail sale via stalls and markets of food, beverages and tobacco products	Retail trade, except of motor vehicles and motorcycles; repair of personal and household goods (52)
a7bb8e3a-3d68-4665-9ba2-cb4ae3c1eee7	4782:Retail sale via stalls and markets of textiles, clothing and footwear	Retail trade, except of motor vehicles and motorcycles; repair of personal and household goods (52)
91651648-1388-4219-84ad-99d290d22475	4789:Retail sale via stalls and markets of other goods	Retail trade, except of motor vehicles and motorcycles; repair of personal and household goods (52)
5ca2d3ba-edf1-4ed2-bfef-ecd66b275eab	479:Retail trade not in stores, stalls or markets	Retail trade, except of motor vehicles and motorcycles; repair of personal and household goods (52)
318d6a83-d35d-4cb9-8555-f26601ee1c6b	4791:Retail sale via mail order houses or via Internet	Retail trade, except of motor vehicles and motorcycles; repair of personal and household goods (52)
30a339e1-6e7d-49c7-b522-e2f5289179b4	4799:Other retail sale not in stores, stalls or markets	Retail trade, except of motor vehicles and motorcycles; repair of personal and household goods (52)
6012a547-1eb7-48ec-a599-24f231eb16e1	49:Land transport and transport via pipelines	Transport via railways	Other land transport	Transport via pipelines
7ee91718-1d43-41ce-91a4-9042d8a4bd3b	491:Transport via railways	Transport via railways
6709702f-062f-411b-9d54-baadfdd62383	4911:Passenger rail transport, interurban	Transport via railways
820a781e-a787-46f3-8ede-6f741c2745d8	4912:Freight rail transport	Transport via railways
1d54ab7d-c743-4ec0-a961-48c367c70f3a	492:Other land transport	Other land transport
0361351a-6b01-4f21-b29b-c752c20bc21f	4921:Urban and suburban passenger land transport	Other land transport
be39820a-80ae-4419-9621-ec9499c13d21	4922:Other passenger land transport	Other land transport
0783fec2-42b8-41e0-9944-cdba0fe68601	4923:Freight transport by road	Other land transport
a3dc21a5-e3b8-44e5-83c0-703dedbbb480	493:Transport via pipeline	Transport via pipelines
4bb326bb-e3df-4d71-b77c-f9a2f7e55536	4930:Transport via pipeline	Transport via pipelines
d6f1f6fc-727e-48cb-935b-cb1d617a62d3	50:Water transport	Sea and coastal water transport	Inland water transport
e3ef814c-9f70-45e8-a0fa-d8ead067729d	501:Sea and coastal water transport	Sea and coastal water transport
d311de25-ded7-47f0-8100-cfb3177ee595	5011:Sea and coastal passenger water transport	Sea and coastal water transport
8d28589c-e03a-463e-8cad-74c053cb299f	5012:Sea and coastal freight water transport	Sea and coastal water transport
671bf787-82a1-48b3-bee4-debadf8f6821	502:Inland water transport	Inland water transport
5c9e1c2d-a3de-4c71-98d6-d4598fd44846	5021:Inland passenger water transport	Inland water transport
335f8d7b-3b35-4cbe-bcac-b9cf0e28a149	5022:Inland freight water transport	Inland water transport
05d7b700-860c-4ea2-8e40-12844bbd5ee1	51:Air transport	Air transport (62)
bf60e093-5578-4803-8635-e9c4c69db37d	511:Passenger air transport	Air transport (62)
6602f0db-7474-431a-beb6-78e0eedc9a47	5110:Passenger air transport	Air transport (62)
aca9a5b1-09d8-48c1-9008-8ff92e32dca7	512:Freight air transport	Air transport (62)
a1976dea-79de-400a-815d-bdf9ed654d45	5120:Freight air transport	Air transport (62)
549573d9-d6f0-4cc6-a6cf-647a418e456f	52:Warehousing and support activities for transportation	Supporting and auxiliary transport activities; activities of travel agencies (63)
78ebae3a-f7a4-4200-9ee9-dd128f5f68b7	521:Warehousing and storage	Supporting and auxiliary transport activities; activities of travel agencies (63)
bf633776-93d7-4f1e-8600-6e648507c434	5210:Warehousing and storage	Supporting and auxiliary transport activities; activities of travel agencies (63)
d661de0f-3dbd-45e8-ad50-b37bb139fe6f	522:Support activities for transportation	Supporting and auxiliary transport activities; activities of travel agencies (63)
73b733ef-8a14-44a9-99c5-3dbf835748a9	5221:Service activities incidental to land transportation	Supporting and auxiliary transport activities; activities of travel agencies (63)
e52c0d65-4fbd-46fa-9b41-af4307b6cfdf	5222:Service activities incidental to water transportation	Supporting and auxiliary transport activities; activities of travel agencies (63)
4f4a6ec3-e17a-4ad4-b431-691ea4cc9407	5223:Service activities incidental to air transportation	Supporting and auxiliary transport activities; activities of travel agencies (63)
c1bedde9-9c78-46f6-8e94-70a7417c7df2	5224:Cargo handling	Supporting and auxiliary transport activities; activities of travel agencies (63)
4c30bbfb-a4ef-4588-8473-a1209a8943ae	5229:Other transportation support activities	Supporting and auxiliary transport activities; activities of travel agencies (63)
79f1f27e-deb8-487d-8ce7-f0e6fb36e778	53:Postal and courier activities	Post and telecommunications (64)
9731f70c-5ade-47d7-97e8-12805659b6e8	531:Postal activities	Post and telecommunications (64)
9af8ebae-77fa-467b-a68a-d70b626e07e0	5310:Postal activities	Post and telecommunications (64)
7d8797bc-b6f2-49ca-9531-6bee9043f3af	532:Courier activities	Post and telecommunications (64)
129122cd-51ff-481d-ab86-ae74c42b61d6	5320:Courier activities	Post and telecommunications (64)
4e3b16fd-4339-4da2-89fa-1776b6d26ee3	55:Accommodation	Hotels and restaurants (55)
b4d16b10-a38d-4191-b703-8dc4e9a3185c	551:Short term accommodation activities	Hotels and restaurants (55)
a16b303d-d3d2-40a5-934a-8648c24dfe9a	5510:Short term accommodation activities	Hotels and restaurants (55)
4e244769-0c3d-482a-922d-3e3430cbf97d	552:Camping grounds, recreational vehicle parks and trailer parks	Hotels and restaurants (55)
b7f9d729-4993-43fd-9093-b2c8732b0d92	5520:Camping grounds, recreational vehicle parks and trailer parks	Hotels and restaurants (55)
c13be2c0-c28c-4369-ad45-94ae1281bf18	559:Other accommodation	Hotels and restaurants (55)
04b32bf5-e18b-4304-b640-f7aecc1a0402	5590:Other accommodation	Hotels and restaurants (55)
c9135e5a-99c5-454f-9fb9-b385422ddb3e	56:Food and beverage service activities	Hotels and restaurants (55)
0f415ee8-1520-4650-a44a-ec7d78c7d47d	561:Restaurants and mobile food service activities	Hotels and restaurants (55)
b3547cea-491c-4564-8cf1-12a290c51289	5610:Restaurants and mobile food service activities	Hotels and restaurants (55)
b16e57af-8eb6-487b-8f81-35c160258ad2	562:Event catering and other food service activities	Hotels and restaurants (55)
216ef364-ec9f-4618-8166-e702f12c2209	5621:Event catering	Hotels and restaurants (55)
6b2461a8-606e-4a28-bbde-25b062b46c68	5629:Other food service activities	Hotels and restaurants (55)
5e55da90-9449-4df6-a211-dc9fdbdb2864	563:Beverage serving activities	Hotels and restaurants (55)
331ba9ef-7e34-4c7a-891b-af7b1b450107	5630:Beverage serving activities	Hotels and restaurants (55)
891f9e09-c029-49b1-a3c9-81c2b4888431	58:Publishing activities	Publishing, printing and reproduction of recorded media (22)
6e4f7d06-fafa-4055-be84-7fdc3985e617	581:Publishing of books, periodicals and other publishing activities	Publishing, printing and reproduction of recorded media (22)
fbcfe2c1-c31f-43f6-80f9-54cf5e867966	5811:Book publishing	Publishing, printing and reproduction of recorded media (22)
835a354d-caa4-4bcc-b8bd-c659d7847392	5812:Publishing of directories and mailing lists	Publishing, printing and reproduction of recorded media (22)
06eb859b-f8c4-403f-805f-80e2680bcfc7	5813:Publishing of newspapers, journals and periodicals	Publishing, printing and reproduction of recorded media (22)
a04d5e46-0285-4b0e-91f7-bc859ada80cb	5819:Other publishing activities	Publishing, printing and reproduction of recorded media (22)
e1dd95a1-c4d9-40c0-a0d9-678e6f41614e	582:Software publishing	Publishing, printing and reproduction of recorded media (22)
8f8fb6f8-42dc-4928-8f67-b9c4ec076574	5820:Software publishing	Publishing, printing and reproduction of recorded media (22)
c68582e4-0767-40fe-8c98-a310b9666f5b	59:Motion picture, video and television programme production, sound recording an	Publishing, printing and reproduction of recorded media (22)
df47c3af-5bbe-404f-a328-4c852ba8f9b7	591:Motion picture, video and television programme activities	Publishing, printing and reproduction of recorded media (22)
9965c3e0-dd25-44e7-a11e-36fd01e1891a	5911:Motion picture, video and television programme production activities	Publishing, printing and reproduction of recorded media (22)
05d800e5-554e-49b0-b657-6a3e35cc4432	5912:Motion picture, video and television programme post-production activities	Publishing, printing and reproduction of recorded media (22)
e7efefaa-8e4b-4808-97ff-27c990a7999c	5913:Motion picture, video and television programme distribution activities	Publishing, printing and reproduction of recorded media (22)
a98d70ca-f6b9-4287-96fd-35526b4f22ea	5914:Motion picture projection activities	Publishing, printing and reproduction of recorded media (22)
3853ce23-72e8-454f-92a7-d1947ee0773a	592:Sound recording and music publishing activities	Publishing, printing and reproduction of recorded media (22)
32e33aa2-5b06-4405-8169-f5ddbc66cfe6	5920:Sound recording and music publishing activities	Publishing, printing and reproduction of recorded media (22)
2b554999-32f9-4fc0-b195-fad10e12a9bb	60:Programming and broadcasting activities	Post and telecommunications (64)
d3443445-0730-441b-8b53-faf34c588378	601:Radio broadcasting	Post and telecommunications (64)
564e3808-d0d5-440e-a799-6c9bf13b8791	6010:Radio broadcasting	Post and telecommunications (64)
d1c26894-96fd-4356-9a31-823ae41a9545	602:Television programming and broadcasting activities	Post and telecommunications (64)
7a5477cd-15c5-4c57-a2af-1acf1e4550bb	6020:Television programming and broadcasting activities	Post and telecommunications (64)
165c94b4-2077-4382-94a6-df08f4d1603f	61:Telecommunications	Post and telecommunications (64)
12baaeef-24a7-422f-bc25-7bbd7cfde7fc	611:Wired telecommunications activities	Post and telecommunications (64)
7a472282-0df8-4bb7-8a98-e2cadd137ca2	6110:Wired telecommunications activities	Post and telecommunications (64)
4796843d-612a-4547-8c8b-187fc32f62d9	612:Wireless telecommunications activities	Post and telecommunications (64)
70f648a5-85fc-4d11-a7ab-a2648b67eeac	6120:Wireless telecommunications activities	Post and telecommunications (64)
18ac363d-2303-4e13-929a-77b69cf64c90	613:Satellite telecommunications activities	Post and telecommunications (64)
f4eb401a-04f9-4f8f-8dcb-1ce1397fbec5	6130:Satellite telecommunications activities	Post and telecommunications (64)
7ca8ce16-639b-4a18-b839-e646ff61f0a9	619:Other telecommunications activities	Post and telecommunications (64)
1c5e57fe-6f50-400f-b3b2-8c248931bbbe	6190:Other telecommunications activities	Post and telecommunications (64)
e9c88244-2e20-44b2-9c6a-ec3a6dcde2b6	62:Computer programming, consultancy and related activities	Computer and related activities (72)
e3e81ccc-c051-4896-9f5d-eb0340ca77e6	620:Computer programming, consultancy and related activities	Computer and related activities (72)
b01713df-758e-4261-86ad-0b4c59d82d39	6201:Computer programming activities	Computer and related activities (72)
1cadbcb6-d285-4679-8bf1-1421a4b39316	6202:Computer consultancy and computer facilities management activities	Computer and related activities (72)
89670cd7-c183-4e30-a778-98a24759ba10	6209:Other information technology and computer service activities	Computer and related activities (72)
d45ed509-13f1-45d6-bbd5-8c429ba2ac13	63:Information service activities	Computer and related activities (72)
0be6a9d2-c32c-4a3a-8954-609819dfd001	631:Data processing, hosting and related activities; web portals	Computer and related activities (72)
b4d84406-12cd-4bc0-a3ac-848cb9e22da3	6311:Data processing, hosting and related activities	Computer and related activities (72)
9e768567-730a-47f4-bdb9-83a249f8e682	6312:Web portals	Other business activities (74)
8d246483-273e-4873-84c8-c13d2475b022	639:Other information service activities	Other business activities (74)
b41f610a-7dea-4a9a-96d3-54534fa6111f	6391:News agency activities	Other business activities (74)
be2185c2-c386-4fea-9567-05fb5d9876a4	6399:Other information service activities n.e.c.	Other business activities (74)
f55de2cc-6a5e-4bf8-8dce-b0096f972c21	64:Financial service activities, except insurance and pension funding	Financial intermediation, except insurance and pension funding (65)
a3cdde12-e0e2-4f67-b5fb-44ea55c389a4	641:Monetary intermediation	Financial intermediation, except insurance and pension funding (65)
594192e2-423c-45e0-be90-2a869e23b96f	6411:Central banking	Financial intermediation, except insurance and pension funding (65)
d81711e6-4fae-499e-8d3b-86a97f871b61	6419:Other monetary intermediation	Financial intermediation, except insurance and pension funding (65)
36b2cb36-1598-4ecb-b324-6f8bd1c2e966	642:Activities of holding companies	Financial intermediation, except insurance and pension funding (65)
494b2856-8df5-4584-a58c-5f2672aa4572	6420:Activities of holding companies	Financial intermediation, except insurance and pension funding (65)
c7e95e3d-1412-4a9f-bfd9-4cf1335486d2	643:Trusts, funds and similar financial entities	Financial intermediation, except insurance and pension funding (65)
b0b0a379-1207-40d9-9211-17238c740365	6430:Trusts, funds and similar financial entities	Financial intermediation, except insurance and pension funding (65)
4dd23cd4-ac1d-4153-b022-20fd7d6b6ebe	649:Other financial service activities, except insurance and pension funding act	Financial intermediation, except insurance and pension funding (65)
f862ad6e-fec4-4f05-a720-21eca74740da	6491:Financial leasing	Financial intermediation, except insurance and pension funding (65)
30a7b15a-897f-4f06-82cb-3c431962b3b1	6492:Other credit granting	Financial intermediation, except insurance and pension funding (65)
d455ec1e-cff4-42d2-b40b-1c19e0b53c74	6499:Other financial service activities, except insurance and pension funding ac	Financial intermediation, except insurance and pension funding (65)
71cbd537-de53-4eae-b5fb-5e4c3b6243f6	65:Insurance, reinsurance and pension funding, except compulsory social security	Insurance and pension funding, except compulsory social security (66)
8457b895-1df1-4335-9796-32950912e5bf	651:Insurance	Insurance and pension funding, except compulsory social security (66)
26238bbe-9301-4a0b-b795-9da3ed788ba8	6511:Life insurance	Insurance and pension funding, except compulsory social security (66)
49854a36-ed8d-4a9b-b16f-33ec6a332f6e	6512:Non-life insurance	Insurance and pension funding, except compulsory social security (66)
42562776-7db8-4542-b4e3-4dd1572dd626	652:Reinsurance	Insurance and pension funding, except compulsory social security (66)
a9171030-8899-4406-8550-f53d77c432d9	6520:Reinsurance	Insurance and pension funding, except compulsory social security (66)
bc758112-937f-4d4a-abec-b45e436bbd31	653:Pension funding	Insurance and pension funding, except compulsory social security (66)
b0bf5916-d21e-4f91-9b90-f09c08ac560d	6530:Pension funding	Insurance and pension funding, except compulsory social security (66)
357e03b0-db78-40d6-b5f8-6ef2c62afbb8	66:Activities auxiliary to financial service and insurance activities	Activities auxiliary to financial intermediation (67)
a4380fe8-90be-4f61-a3bc-5a1f615a8de0	661:Activities auxiliary to financial service activities, except insurance and p	Activities auxiliary to financial intermediation (67)
a2e2c32d-f690-4739-8533-ffb1b5079be1	6611:Administration of financial markets	Activities auxiliary to financial intermediation (67)
d06fa13b-9556-4b82-98e8-6d57cae7bc82	6612:Security and commodity contracts brokerage	Activities auxiliary to financial intermediation (67)
608d1de1-31c7-4766-b1cf-63f4666b6ffe	6619:Other activities auxiliary to financial service activities	Activities auxiliary to financial intermediation (67)
e6c45c39-45d9-4b37-933a-c485e839f713	662:Activities auxiliary to insurance and pension funding	Activities auxiliary to financial intermediation (67)
15a0319a-9173-4e80-8473-3ffccf13e91f	6621:Risk and damage evaluation	Activities auxiliary to financial intermediation (67)
7c93938f-b364-4492-b26d-bb75fcab4c45	6622:Activities of insurance agents and brokers	Activities auxiliary to financial intermediation (67)
319643e5-c324-4efc-872f-c7db5ecdfabf	6629:Other activities auxiliary to insurance and pension funding	Activities auxiliary to financial intermediation (67)
be669ecf-bf0b-4b68-86f2-e8c5228aedc0	663:Fund management activities	Activities auxiliary to financial intermediation (67)
1b602da0-cd3b-4386-865e-6d6c2513de01	6630:Fund management activities	Activities auxiliary to financial intermediation (67)
1d003898-c1cd-4d37-9d3d-31661ab60561	68:Real estate activities	Real estate activities (70)
1a1f36d4-8a3a-4a97-b46c-29ec5ac8f30e	681:Real estate activities with own or leased property	Real estate activities (70)
2bf228b6-1a1b-4bb8-a5d2-54026dbd247c	6810:Real estate activities with own or leased property	Real estate activities (70)
6804b0a0-3919-4d9b-b8c2-063db75178de	682:Real estate activities on a fee or contract basis	Real estate activities (70)
7135a056-feda-40af-abaf-5dc665517f0e	6820:Real estate activities on a fee or contract basis	Real estate activities (70)
79a2d40b-198d-4ed2-8adb-3b6e66ada569	69:Legal and accounting activities	Other business activities (74)
5627415f-1681-46ff-b351-ed50bf256608	691:Legal activities	Other business activities (74)
0760caf0-f338-405d-bb20-8a0e5ec293de	6910:Legal activities	Other business activities (74)
e3d141d2-952a-41da-8f06-ee878bfed090	692:Accounting, bookkeeping and auditing activities; tax consultancy	Other business activities (74)
79eb68a0-c5ae-4858-b029-01c178041c38	6920:Accounting, bookkeeping and auditing activities; tax consultancy	Other business activities (74)
bc211f5f-9ce7-49d0-bafb-f9e5d33fe3c8	70:Activities of head offices; management consultancy activities	Other business activities (74)
47e51285-722f-42d0-80d3-d3e70798786b	701:Activities of head offices	Other business activities (74)
e29aa215-fad0-41ef-a46b-3b3b8e5033aa	7010:Activities of head offices	Other business activities (74)
d4a532f6-4c8d-41b2-93c5-2a7c5ae280a5	702:Management consultancy activities	Other business activities (74)
8e362c26-87da-498d-bce4-645faff8979d	7020:Management consultancy activities	Other business activities (74)
8086a574-5613-476c-a7a6-53a8a2a2c582	71:Architectural and engineering activities; technical testing and analysis	Other business activities (74)
0056f8cd-2208-4dac-b695-691b0a04f92a	711:Architectural and engineering activities and related technical consultancy	Other business activities (74)
28af4e26-2b7d-460e-92df-078b1404d466	7110:Architectural and engineering activities and related technical consultancy	Other business activities (74)
9629d6fc-c520-48d9-8d3b-7fc6866d8902	712:Technical testing and analysis	Other business activities (74)
85821f48-ac2f-44b6-a008-11f2ec6b0173	7120:Technical testing and analysis	Other business activities (74)
d4716931-ba21-4ccd-9ef2-22d06ce77e79	72:Scientific research and development	Research and development (73)
4dfb6ed1-f5f4-472d-8b0b-24467bdc6eaa	721:Research and experimental development on natural sciences and engineering	Research and development (73)
81b7f5f1-12cb-45a4-b682-00f5cd0b97e9	7210:Research and experimental development on natural sciences and engineering	Research and development (73)
4e0c4ef3-53c9-4581-92f6-0d999d193450	722:Research and experimental development on social sciences and humanities	Research and development (73)
3d7a6e23-4fa2-47fa-b467-4b9a85dae232	7220:Research and experimental development on social sciences and humanities	Research and development (73)
4c1e2b0e-ae43-495b-9f5c-01a5375bbb01	73:Advertising and market research	Other business activities (74)
6ad5cd9d-daa4-43f9-94d2-8c9d951ccfcf	731:Advertising	Other business activities (74)
7cf03a13-4bc1-4f20-a507-b395d2c4e549	7310:Advertising	Other business activities (74)
ba3a38bb-cefc-4723-9f8b-504385b661b5	732:Market research and public opinion polling	Other business activities (74)
8f8cf6a0-c658-45de-b7dd-70df6c42c221	7320:Market research and public opinion polling	Other business activities (74)
f7053287-151e-4cca-896d-ab07b1846f52	74:Other professional, scientific and technical activities	Other business activities (74)
60181a9b-5e94-406c-a5d2-6deff20591c1	741:Specialized design activities	Other business activities (74)
5e0bb151-de66-49c4-b8bb-eca71baaf957	7410:Specialized design activities	Other business activities (74)
34d31206-cfc9-4290-bdf7-40beaa32fb12	742:Photographic activities	Other business activities (74)
dd557ca3-7e21-47ae-abb8-b48eebd15972	7420:Photographic activities	Other business activities (74)
61f30296-5f58-4f0e-a9cd-b091fea91a6e	749:Other professional, scientific and technical activities n.e.c.	Other business activities (74)
e5fb89a3-2370-4a90-b8aa-0dfdcedcce10	7490:Other professional, scientific and technical activities n.e.c.	Other business activities (74)
9bdfe275-d909-469a-b7ab-59c0276324f7	75:Veterinary activities	Other business activities (74)
9da1f192-bea0-4d4d-ad5c-9f07964291cc	750:Veterinary activities	Other business activities (74)
030f8c67-c7be-4ad1-804a-8a95f3d93e59	7500:Veterinary activities	Other business activities (74)
e6ebcaba-82ab-44e2-8af6-dcf9588253f9	77:Rental and leasing activities	Other business activities (74)
75bc0b69-da0f-4d03-8801-b670b2771a3d	771:Renting and leasing of motor vehicles	Other business activities (74)
50437c54-b03f-4dd9-b8da-4aefa7d652bb	7710:Renting and leasing of motor vehicles	Other business activities (74)
4254626d-37b7-4373-8575-1fc31c6255a2	772:Renting and leasing of personal and household goods	Other business activities (74)
cf4e16ce-baad-4a6a-ba62-ab2ec0bdb3c7	7721:Renting and leasing of recreational and sports goods	Other business activities (74)
7dba5292-095b-4796-880a-849b982e1ab8	7722:Renting of video tapes and disks	Other business activities (74)
ce93fb33-0e84-4450-a7cb-f08b020c80a5	7729:Renting and leasing of other personal and household goods	Other business activities (74)
8464f70f-3faa-4d61-a444-08cc2543ba2e	773:Renting and leasing of other machinery, equipment and tangible goods	Other business activities (74)
dcd72ac3-6b19-45f4-badb-37f523b397c5	7730:Renting and leasing of other machinery, equipment and tangible goods	Other business activities (74)
3b041d5d-951d-40b1-b7eb-d1623ebac06e	774:Leasing of intellectual property and similar products, except copyrighted wo	Other business activities (74)
9786ca55-8c2e-4ec3-8805-cc086c403b48	7740:Leasing of intellectual property and similar products, except copyrighted w	Other business activities (74)
f8944dcb-01b2-430b-8ff1-6c5960044ff2	78:Employment activities	Other business activities (74)
84075720-566f-4df9-bbfc-a2498d8ba1e4	781:Activities of employment placement agencies	Other business activities (74)
f73c379b-ddbe-4eee-aae6-c28207a405a2	7810:Activities of employment placement agencies	Other business activities (74)
b69b4d6c-e7a9-4055-bb4c-c420649e6e71	782:Temporary employment agency activities	Other business activities (74)
92951421-66a9-434b-81ef-01b4776e9214	7820:Temporary employment agency activities	Other business activities (74)
98eb2fd3-c368-4689-a1d6-4edf37cb3bae	783:Other human resources provision	Other business activities (74)
8038dee9-b4e1-4fd4-97e3-b3a13a717eb5	7830:Other human resources provision	Other business activities (74)
355d7ab4-e479-47a6-9066-589aff5ee894	79:Travel agency, tour operator, reservation service and related activities	Supporting and auxiliary transport activities; activities of travel agencies (63)
e64d1ba3-787f-4b41-bcab-d6edbcc05def	791:Travel agency and tour operator activities	Supporting and auxiliary transport activities; activities of travel agencies (63)
958bfbfd-5154-4d88-82de-eb8ed4af10fa	7911:Travel agency activities	Supporting and auxiliary transport activities; activities of travel agencies (63)
fa8acce6-9ec3-4445-ae3a-c6e1f1c445d3	7912:Tour operator activities	Supporting and auxiliary transport activities; activities of travel agencies (63)
41022f00-94c2-4cd0-963c-be4902deb488	799:Other reservation service and related activities	Supporting and auxiliary transport activities; activities of travel agencies (63)
e605a3dc-5a26-4fcc-b497-5bfbc03583a8	7990:Other reservation service and related activities	Supporting and auxiliary transport activities; activities of travel agencies (63)
248c5f5e-aeb4-4aad-8273-4a5051cecf90	80:Security and investigation activities	Other business activities (74)
9225d0d0-d708-44c6-8098-a05a0e90098f	801:Private security activities	Other business activities (74)
852cb3e2-1ed4-400e-a8bf-9fbcc3a1b220	8010:Private security activities	Other business activities (74)
9442f4ac-8972-4c3a-b906-4f45a875a62e	802:Security systems service activities	Other business activities (74)
30524e0b-861f-4de5-a40c-f14f9b44cecf	8020:Security systems service activities	Other business activities (74)
01c902be-ebb1-4276-b143-71bd571df784	803:Investigation activities	Other business activities (74)
b6f6db54-c780-40c5-be41-a88150bf90e7	8030:Investigation activities	Other business activities (74)
1f8beaf0-bad2-432d-923a-ee164f4cefd6	81:Services to buildings and landscape activities	Other business activities (74)
c76ab3c5-dd30-4791-b79f-2931203890c2	811:Combined facilities support activities	Other business activities (74)
c4b89873-a66d-4882-b523-a613b9aacd88	8110:Combined facilities support activities	Other business activities (74)
7fb3da09-4058-4fc6-a4d2-172f39201d9c	812:Cleaning activities	Other business activities (74)
3a88c807-ac15-4a63-8222-6c2b85358f00	8121:General cleaning of buildings	Other business activities (74)
b8e98643-c81f-414a-ad7c-36717c5c511c	8129:Other building and industrial cleaning activities	Other business activities (74)
976e52e9-819b-42da-882c-78c3fa0b3946	813:Landscape care and maintenance service activities	Other business activities (74)
4f3fe1ca-4fa6-4e3f-ad8c-f17ce448c23d	8130:Landscape care and maintenance service activities	Other business activities (74)
f85962c5-e772-4b02-bd40-58329e3a0ee0	82:Office administrative, office support and other business support activities	Other business activities (74)
c0995ac0-c14b-4a8f-9a20-8f3c859d2beb	821:Office administrative and support activities	Other business activities (74)
544fd14d-6283-4a91-b357-07934b21d694	8211:Combined office administrative service activities	Other business activities (74)
7ff1dc79-5669-4791-ad93-ec258b1fc334	8219:Photocopying, document preparation and other specialized office support act	Other business activities (74)
4ed9145e-8e3d-4092-88c7-6f2d01aca4c5	822:Activities of call centres	Other business activities (74)
fb8ef8f1-ac26-4b78-8693-37c6c695f833	8220:Activities of call centres	Other business activities (74)
75dc565a-69d2-433c-bfd5-5b57a53a5c38	823:Organization of conventions and trade shows	Other business activities (74)
cb259203-e8e7-431e-822d-985ee83575c7	8230:Organization of conventions and trade shows	Other business activities (74)
0da1a325-c407-436d-b72c-4d5ae6218576	829:Business support service activities n.e.c.	Other business activities (74)
f57972af-fd2f-42b1-8bbf-6e4720adb494	8291:Activities of collection agencies and credit bureaus	Other business activities (74)
0964de5d-3516-480c-a8c2-177d205bd0c8	8292:Packaging activities	Other business activities (74)
f9da0e69-150a-4d71-aa9a-e78f76d7ad26	8299:Other business support service activities n.e.c.	Other business activities (74)
b6182e03-8b3c-4e3e-b5d1-322032d2c4bf	84:Public administration and defence; compulsory social security	Public administration and defence; compulsory social security (75)
7bdef184-1440-4dff-9f22-20e05edf02f7	841:Administration of the State and the economic and social policy of the commun	Public administration and defence; compulsory social security (75)
b771299d-8abd-40c5-aedf-9f8dff2a9275	8411:General public administration activities	Public administration and defence; compulsory social security (75)
fe3768e5-7662-4ae5-a119-74ec1c66b07b	8412:Regulation of the activities of providing health care, education, cultural	Public administration and defence; compulsory social security (75)
4829a565-4f49-443e-a14e-6ac2ff76c4a3	8413:Regulation of and contribution to more efficient operation of businesses	Public administration and defence; compulsory social security (75)
2c587f58-6a81-4952-a977-6b6e442f0b65	842:Provision of services to the community as a whole	Public administration and defence; compulsory social security (75)
33344314-6d8a-49f1-b0c0-d552918b69f1	8421:Foreign affairs	Public administration and defence; compulsory social security (75)
de87d706-4cf2-4978-8e4a-afe58ff8f11e	8422:Defence activities	Public administration and defence; compulsory social security (75)
f9b3d689-7fed-4e91-8a1b-88f29c6ff805	8423:Public order and safety activities	Public administration and defence; compulsory social security (75)
075c140c-606d-4947-ada4-267eb0d1cb3d	843:Compulsory social security activities	Public administration and defence; compulsory social security (75)
3008298d-78b7-4907-95ac-fe42088d0f7f	8430:Compulsory social security activities	Public administration and defence; compulsory social security (75)
ca87b631-2504-4e8b-9e21-af09d389ad3c	85:Education	Education (80)
8479dfba-6b06-4542-bdeb-039eab582ee9	851:Pre-primary and primary education	Education (80)
d2fb1bbf-a7b1-45f1-9d25-db7e28a70db2	8510:Pre-primary and primary education	Education (80)
949a7927-f0a1-47ba-91a8-17a1aa4da553	852:Secondary education	Education (80)
0bbdffd2-e8ef-487f-b821-c38db87626ac	8521:General secondary education	Education (80)
7be48458-dbf3-480f-b722-d1eee0645e8b	8522:Technical and vocational secondary education	Education (80)
c2483001-f821-4116-bc83-c8833ecc6c69	853:Higher education	Education (80)
152e546c-0049-4f5e-a8c4-20bfcf98820b	8530:Higher education	Education (80)
bc3c08fb-8e05-4815-b50e-6968203560f7	854:Other education	Education (80)
32d325ce-21c6-468a-a7cd-a7aef37f1a8d	8541:Sports and recreation education	Education (80)
7e518b16-b9ad-407d-87b4-4e74f817b6ad	8542:Cultural education	Education (80)
56f4b20a-a69d-4e31-8ed0-fc361b37df59	8549:Other education n.e.c.	Education (80)
469b1619-37af-426a-9d23-afed42eb1c48	855:Educational support activities	Education (80)
14017d83-379c-476c-8af9-a0b03ba3b484	8550:Educational support activities	Education (80)
824f9706-54ba-4de0-9c4f-cfb73d276fef	86:Human health activities	Health and social work (85)
e7eb4310-ec1e-4a3b-ab4c-1b722c102e0a	861:Hospital activities	Health and social work (85)
7c3153dc-09a2-417a-a3c4-7377217e71e1	8610:Hospital activities	Health and social work (85)
e574fecf-56cc-4e8d-bd81-0d7ab3ed17cf	862:Medical and dental practice activities	Health and social work (85)
ed52ec57-bc32-4378-9fd5-b847ee32b3f4	8620:Medical and dental practice activities	Health and social work (85)
42703319-9e5c-4894-9abb-9e3cd1a8fafe	869:Other human health activities	Health and social work (85)
15b7071f-02eb-4aa5-bd91-0f8ab44a6876	8690:Other human health activities	Health and social work (85)
e26aed7b-4c01-4618-a0e1-7a996e3a7eb9	87:Residential care activities	Health and social work (85)
bdaca06b-b0f5-4844-861a-7d6594fd1c22	871:Residential nursing care facilities	Health and social work (85)
b7cd11f0-85e7-4077-8461-c4f7c5b4fafd	8710:Residential nursing care facilities	Health and social work (85)
c0bb839f-642f-49dd-a562-1958a8194482	872:Residential care activities for mental retardation, mental health and substa	Health and social work (85)
b6e04c9b-25fd-4373-ae19-8142fa8e38b8	8720:Residential care activities for mental retardation, mental health and subst	Health and social work (85)
83a403fc-8d48-4b16-a96d-d19e11153d7a	873:Residential care activities for the elderly and disabled	Health and social work (85)
cbe139b2-d020-400f-a962-c0a452f2fe17	8730:Residential care activities for the elderly and disabled	Health and social work (85)
ebeb564d-0889-4b71-b303-1d6cb05408cf	879:Other residential care activities	Health and social work (85)
7c846b34-e322-4c7b-9c3b-1a45e1127b67	8790:Other residential care activities	Health and social work (85)
bc6e631e-572c-453c-8a3f-d093d07f9c59	88:Social work activities without accommodation	Health and social work (85)
e18d736e-5e3b-4e33-bd91-44edbb8016c7	881:Social work activities without accommodation for the elderly and disabled	Health and social work (85)
980f3246-835e-49eb-a2f4-1d506f17b744	8810:Social work activities without accommodation for the elderly and disabled	Health and social work (85)
8f6eb3c8-6a0d-42f5-a785-5ce9c65d28fe	889:Other social work activities without accommodation	Health and social work (85)
612513c7-22e7-46f5-9e30-b195e9716d2d	8890:Other social work activities without accommodation	Health and social work (85)
92cc7014-3aaf-4926-ad31-80eeb2ada88d	90:Creative, arts and entertainment activities	Recreational, cultural and sporting activities (92)
c6bfa9c8-b5ab-45f3-8c54-aad29d31a78f	900:Creative, arts and entertainment activities	Recreational, cultural and sporting activities (92)
3875da25-c59b-4679-8c6e-54c779fca233	9000:Creative, arts and entertainment activities	Recreational, cultural and sporting activities (92)
f55a95a9-8f5d-415c-846f-9b8eb99e7993	91:Libraries, archives, museums and other cultural activities	Recreational, cultural and sporting activities (92)
7acece3e-fa0c-495f-8f60-87cd1af42c6c	910:Libraries, archives, museums and other cultural activities	Recreational, cultural and sporting activities (92)
92b17089-1cf1-4d09-9808-c9277b09af8c	9101:Library and archives activities	Recreational, cultural and sporting activities (92)
f69fd4c2-3da9-4a54-a13d-9d565418b3df	9102:Museums activities and operation of historical sites and buildings	Recreational, cultural and sporting activities (92)
3c034e81-0345-466c-b696-9b50d0d240fe	9103:Botanical and zoological gardens and nature reserves activities	Recreational, cultural and sporting activities (92)
72a7862c-8889-4cae-b0ba-9e8f1b3c04f6	92:Gambling and betting activities	Recreational, cultural and sporting activities (92)
96518153-e765-48e2-a208-cda2fb147670	920:Gambling and betting activities	Recreational, cultural and sporting activities (92)
6fd72f58-a990-4353-ba92-5b7b9b43626f	9200:Gambling and betting activities	Recreational, cultural and sporting activities (92)
af7394e6-c33c-4edf-aa0f-ffb068c3123b	93:Sports activities and amusement and recreation activities	Recreational, cultural and sporting activities (92)
19e93686-0888-4ee7-abf3-70e6535ee823	931:Sports activities	Recreational, cultural and sporting activities (92)
037d6210-d06b-4f4d-bba9-079c0bc798bf	9311:Operation of sports facilities	Recreational, cultural and sporting activities (92)
44b5dcfa-afc0-4134-9ae6-61bdbcae2ab2	9312:Activities of sports clubs	Recreational, cultural and sporting activities (92)
838125d0-3b57-46bb-8337-4a1ce3a3f8ed	9319:Other sports activities	Recreational, cultural and sporting activities (92)
f6091b20-3424-49b7-b092-4e780a2d541c	932:Other amusement and recreation activities	Recreational, cultural and sporting activities (92)
2fefc5a8-9c56-48be-a5f9-7c94d028dab4	9321:Activities of amusement parks and theme parks	Recreational, cultural and sporting activities (92)
d3bae466-522c-46e7-9429-a361fbdf8dda	9329:Other amusement and recreation activities n.e.c.	Recreational, cultural and sporting activities (92)
ad794b11-6c9c-460b-b57e-952af0f12621	94:Activities of membership organizations	Activities of membership organisation n.e.c. (91)
564c0ff1-d00e-4899-93e5-dc21e22d2051	941:Activities of business, employers and professional membership organizations	Activities of membership organisation n.e.c. (91)
87900b2a-84ac-4455-8eea-235d0444b253	9411:Activities of business and employers membership organizations	Activities of membership organisation n.e.c. (91)
c17f6a98-94cf-4054-9323-7c23f1f2e5ae	9412:Activities of professional membership organizations	Activities of membership organisation n.e.c. (91)
29d4ae9e-ad18-43fe-b6d0-d1782b26ae4a	942:Activities of trade unions	Activities of membership organisation n.e.c. (91)
5d09b627-004e-4a60-a95c-aeb09b4e9c24	9420:Activities of trade unions	Activities of membership organisation n.e.c. (91)
e4a59b28-b033-4c3c-b070-7d277913d845	949:Activities of other membership organizations	Activities of membership organisation n.e.c. (91)
0ff50f3b-b5a1-43f5-a115-39312ad16741	9491:Activities of religious organizations	Activities of membership organisation n.e.c. (91)
7b5492b2-862b-4638-a857-736545026eea	9492:Activities of political organizations	Activities of membership organisation n.e.c. (91)
afd2c024-06bf-4d12-9e4e-96aeb3655476	9499:Activities of other membership organizations n.e.c.	Activities of membership organisation n.e.c. (91)
8437a07e-6419-409a-86f3-11334981c8cd	95:Repair of computers and personal and household goods	Retail trade, except of motor vehicles and motorcycles; repair of personal and household goods (52)
1410534d-1e3f-4828-acb3-785630d3a8e5	951:Repair of computers and communication equipment	Retail trade, except of motor vehicles and motorcycles; repair of personal and household goods (52)
accfaea8-70b2-4859-b49f-0fd0c02dabdd	9511:Repair of computers and peripheral equipment	Retail trade, except of motor vehicles and motorcycles; repair of personal and household goods (52)
685d95dd-df61-400c-b6fb-c1ef743e3c04	9512:Repair of communication equipment	Retail trade, except of motor vehicles and motorcycles; repair of personal and household goods (52)
de9db67f-2579-48d2-8519-0672032989fb	952:Repair of personal and household goods	Retail trade, except of motor vehicles and motorcycles; repair of personal and household goods (52)
12ac7476-af84-46f8-8801-22fee7841299	9521:Repair of consumer electronics	Retail trade, except of motor vehicles and motorcycles; repair of personal and household goods (52)
27550de7-2bf3-4c3c-86d5-810e99bb4a47	9522:Repair of household appliances and home and garden equipment	Retail trade, except of motor vehicles and motorcycles; repair of personal and household goods (52)
4bd0eb89-4249-46fb-bc74-db848847ee4e	9523:Repair of footwear and leather goods	Retail trade, except of motor vehicles and motorcycles; repair of personal and household goods (52)
c9af237a-71a5-44d6-a728-2b822b42a6a6	9524:Repair of furniture and home furnishings	Retail trade, except of motor vehicles and motorcycles; repair of personal and household goods (52)
a4cc2905-689e-44f1-8a41-2e068c182bda	9529:Repair of other personal and household goods	Retail trade, except of motor vehicles and motorcycles; repair of personal and household goods (52)
b9716e4b-7d4f-488b-80b7-5eb859594d10	96:Other personal service activities	Other service activities (93)
7d017d7d-6cd3-4d09-804b-d095963eaddf	960:Other personal service activities	Other service activities (93)
df3b4969-2c2e-4097-b726-0f75dff8ba87	9601:Washing and (dry-) cleaning of textile and fur products	Other service activities (93)
f12b2bfd-8cdc-41be-ae94-9ea39312facd	9602:Hairdressing and other beauty treatment	Other service activities (93)
df64fcaf-ff24-489d-bb3b-4decdd04df29	9603:Funeral and related activities	Other service activities (93)
b6c93c05-cb0e-42e3-9258-203bc529c6ed	9609:Other personal service activities n.e.c.	Other service activities (93)
3ab51133-f254-4fb0-b577-e17c7a393234	97:Activities of households as employers of domestic personnel	Private households with employed persons (95)
0f425036-6bc2-4332-a5ef-77e65dc922b9	970:Activities of households as employers of domestic personnel	Private households with employed persons (95)
c60adb17-6cef-4eb6-adff-dbfc327539c4	9700:Activities of households as employers of domestic personnel	Private households with employed persons (95)
316a2e84-6b89-42f0-8c99-754f1af09d99	98:Undifferentiated goods- and services-producing activities of private househol	Private households with employed persons (95)
d7f4796c-f3ee-4698-85b2-d7352551c2f5	981:Undifferentiated goods-producing activities of private households for own us	Private households with employed persons (95)
eaa072c2-2b82-4df0-8f42-aeb7d7ccdde3	9810:Undifferentiated goods-producing activities of private households for own u	Private households with employed persons (95)
2c7885cc-4852-4e51-b7ed-8b5d1535b106	982:Undifferentiated service-producing activities of private households for own	Private households with employed persons (95)
ff535c16-6731-43fd-a7dc-a8a0d785610c	9820:Undifferentiated service-producing activities of private households for own	Private households with employed persons (95)
43c925e0-ff00-40b1-a0d0-c7c0ab89d811	99:Activities of extraterritorial organizations and bodies	Extra-territorial organizations and bodies
2c252d7e-6777-473b-8c2e-2ce134a4dd86	990:Activities of extraterritorial organizations and bodies	Extra-territorial organizations and bodies
61bcfd0a-ab51-42ce-b17c-0aee15c913d7	9900:Activities of extraterritorial organizations and bodies	Extra-territorial organizations and bodies
8e064aa3-0620-416d-be4e-35f75eef11c4	A:Agriculture, forestry and fishing
dc90b1a3-15ce-4d0a-a406-1809cdcfac89	B:Mining and quarrying
8d8458c4-db24-4632-94f5-4b708b9df839	C:Manufacturing
606587d2-45f8-48c8-8957-6e060bf4ab5f	C10-C12: Manufacture of food products, beverages and tobacco products
05e3dab5-b792-460a-baa8-9efba4b33701	C13-C15: Manufacture of textiles, wearing apparel and leather products
371d5770-4661-41e7-a6ff-e494fd001a11	C31-C32: Manufacture of furniture; other manufacturing
a92fc2d2-2f1e-4818-b4bc-7b5c43c27e3b	D:Electricity, gas, steam and air conditioning supply
186dbe60-2403-48ce-accc-6a7666c3c28b	E:Water supply; sewerage, waste management and remediation activities
0b79fb79-6fb7-40db-8f13-c56ab0cdfe01	E37-E39: Sewerage; waste collection, treatment and disposal activities; materials recovery; remediation activities and o
fe497789-229f-4587-ab6e-5485b4bda9a9	F:Construction
10ffa86e-aa50-4ae3-8284-9c85ffba3a7f	G:Wholesale and retail trade; repair of motor vehicles and motorcycles
5ce22aa6-8cc3-471f-a4e2-6184090afb92	H:Transportation and storage
52800990-cf8a-4a12-b764-1b1a6e93a6b5	I:Accommodation and food service activities
44d5290c-e18a-4344-959e-f941f3d5dfbf	J:Information and communication
dfe775f9-34df-456c-9987-166eee72db70	J59-J60: Motion picture, video and television programme production, sound recording and music publishing activities; p
b66fc303-7cab-45c0-899d-be313f2dc970	J62-J63: Computer programming, consultancy and related activities; information service activities
3a69e393-54be-4c95-a7f2-4660a3257810	K:Financial and insurance activities
db4426be-6d18-4741-b56e-2bb9f521fa32	L:Real estate activities
e1b81e79-f7cb-4e12-b089-194c23c89001	M:Professional, scientific and technical activities
5a150585-7f15-44e9-84fa-b5a481ce6ca7	M69-M70: Legal and accounting activities; activities of head offices; management consultancy activities
fe27780e-0132-4317-af9e-6d9fd16115f2	M74-M75: Other professional, scientific and technical activities; veterinary activities
2018daf9-e6ae-4051-81e0-a0a1f8df8586	N:Administrative and support service activities
4675952f-e2f8-44bf-8259-672b59dd86c3	N80-N82: Security and investigation activities; services to buildings and landscape activities; office administrative, o
2d755330-1103-4ca7-8120-35ce12f54485	O:Public administration and defence; compulsory social security
9567696e-fbbf-4db1-80e4-f3c50b4b5e7f	P:Education
b976e564-23c6-494a-b5c5-c2c1c8ac50ed	Q:Human health and social work activities
36838200-0ca7-44fd-9203-8be223ca1d07	Q87-Q88: Social work activities
e557936d-e982-4782-a31a-5d27935e9a73	R:Arts, entertainment and recreation
4f6f1895-0eb9-4bfb-9ea4-daa03fdcd7de	R90-R92: Creative, arts and entertainment activities; libraries, archives, museums and other cultural activities; gambl
9316d807-eac3-4faa-8709-831824c68095	S:Other service activities
d425e322-a773-477f-9576-279607d45e8c	T:Activities of households as employers; undifferentiated goods- and services-pr
fe5d3e16-bcff-408b-a21d-3da859a0e9da	U:Activities of extraterritorial organizations and bodies
[truncated: 115 more columns]

## Sheet: 3. Geographical concordance
geography Id (ecoinvent)	geography name (ecoinvent)	geography shortname (ecoinvent)	EXIOBASE geography 1	EXIOBASE geography 2	EXIOBASE geography 3	EXIOBASE geography 4	EXIOBASE geography 5	EXIOBASE geography 6	EXIOBASE geography 7	EXIOBASE geography 8	EXIOBASE geography 9	EXIOBASE geography 10	EXIOBASE geography 11	EXIOBASE geography 12	EXIOBASE geography 13	EXIOBASE geography 14	EXIOBASE geography 15	EXIOBASE geography 16	EXIOBASE geography 17	EXIOBASE geography 18	EXIOBASE geography 19	EXIOBASE geography 20	EXIOBASE geography 21	EXIOBASE geography 22	EXIOBASE geography 23	EXIOBASE geography 24	EXIOBASE geography 25	EXIOBASE geography 26	EXIOBASE geography 27	EXIOBASE geography 28	EXIOBASE geography 29	EXIOBASE geography 30	EXIOBASE geography 31	EXIOBASE geography 32	EXIOBASE geography 33	EXIOBASE geography 34	EXIOBASE geography 35	EXIOBASE geography 36	EXIOBASE geography 37	EXIOBASE geography 38	EXIOBASE geography 39	EXIOBASE geography 40	EXIOBASE geography 41	EXIOBASE geography 42	EXIOBASE geography 43	EXIOBASE geography 44	EXIOBASE geography 45	EXIOBASE geography 46	EXIOBASE geography 47
0c608726-7d7e-11de-9ae2-0019e336be3a	Afghanistan	AF	RoW Asia and Pacific
2f693dc6-7e28-11de-9820-0019e336be3a	Africa	RAF	RoW Africa
7abf336a-09c3-487b-bdc3-989bbe50ee05	Akrotiri Sovereign Base Area	Akrotiri	Cyprus
1023d322-7d7e-11de-9ae2-0019e336be3a	Åland Islands	AX	Finland
a9c3be27-affe-464c-8ebf-996d8ab6a958	Alaska Systems Coordinating Council	ASCC	United States
097c2556-7d7e-11de-9ae2-0019e336be3a	Albania	AL	RoW Europe
095ec4f2-7d7e-11de-9ae2-0019e336be3a	Algeria	DZ	RoW Africa
098df75e-7d7e-11de-9ae2-0019e336be3a	American Samoa	AS	RoW Asia and Pacific
2ea604e6-e5e8-11de-8102-0019e336be3a	Americas	UN-AMERICAS	United States	Canada	Mexico	Brazil	RoW America
10033c48-7d7e-11de-9ae2-0019e336be3a	Andorra	AD	RoW Europe
098771a4-7d7e-11de-9ae2-0019e336be3a	Angola	AO	RoW Africa
0fefde28-7d7e-11de-9ae2-0019e336be3a	Anguilla	AI	RoW America
105b361e-7d7e-11de-9ae2-0019e336be3a	Antarctica	AQ	Austria	Belgium	Bulgaria	Cyprus	Czech Republic	Germany	Denmark	Estonia	Spain	Finland	France	Greece	Croatia	Hungary	Ireland	Italy	Lithuania	Luxembourg	Latvia	Malta	Netherlands	Poland	Portugal	Romania	Sweden	Slovenia	Slovakia	United Kingdom	United States	Japan	China	Canada	South Korea	Brazil	India	Mexico	Russia	Australia	Switzerland	Turkey	Taiwan	Norway	Indonesia	South Africa	RoW Asia and Pacific	RoW America	RoW Europe
09581fbc-7d7e-11de-9ae2-0019e336be3a	Antigua and Barbuda	AG	RoW America
09951f84-7d7e-11de-9ae2-0019e336be3a	Argentina	AR	RoW America
09818690-7d7e-11de-9ae2-0019e336be3a	Armenia	AM	RoW Asia and Pacific
0fec983a-7d7e-11de-9ae2-0019e336be3a	Aruba	AW	RoW America
4a271c88-5c3c-42de-9bee-1e950cc9d9f5	Ashmore and Cartier Islands	Ashmore and Cartier Islands	RoW Asia and Pacific
19c7cdd2-e590-11de-9dfe-0019e336be3a	Asia	RAS	RoW Asia and Pacific
b7ac8bd0-a9d4-4caf-a832-48a0f3660da7	Asia without China	Asia without China	RoW Asia and Pacific
d509536a-7e28-11de-9820-0019e336be3a	Asia, UN Region	UN-ASIA	RoW Asia and Pacific
09b1a988-7d7e-11de-9ae2-0019e336be3a	Australia	AU	Australia
fb4bde60-e62b-11de-ba56-0019e336be3a	Australia and New Zealand	UN-AUSTRALIANZ	Australia
96e0124a-b1b0-4303-b26c-44ee5857f3a1	Australia, Australian Capital Territory	AUS-ACT	Australia
ee4baa34-3c79-4919-9393-c5d8a9015674	Australia, New South Wales	AUS-NSW	Australia
dbee0af4-00e0-4280-a377-414d0a39998e	Australia, Northern Territory	AUS-NTR	Australia
3624a72f-ca5a-48d6-be41-27e705be5b61	Australia, Queensland	AUS-QNS	Australia
c2bb7d7f-6242-4b3c-98cd-62b03f7a8be3	Australia, South Australia	AUS-SAS	Australia
fdb06d13-ea53-4a9a-878b-7489f2bae2f7	Australia, Tasmania	AUS-TSM	Australia
7441e29d-0a88-49fa-8ce4-eeb7f1949f2f	Australia, Victoria	AUS-VCT	Australia
0ae22e97-4563-473f-9209-3221544a097f	Australia, Western Australia	AUS-WAS	Australia
0d3f4416-7d7e-11de-9ae2-0019e336be3a	Austria	AT	Austria
096781b4-7d7e-11de-9ae2-0019e336be3a	Azerbaijan	AZ	RoW Asia and Pacific
09da334e-7d7e-11de-9ae2-0019e336be3a	Bahamas	BS	RoW America
09cf6a0e-7d7e-11de-9ae2-0019e336be3a	Bahrain	BH	RoW Middle East
43c4f591-2b61-4145-a9f6-e10b4349c2cd	Bajo Nuevo Bank (Petrel Is.)	Bajo Nuevo	RoW America
d4c8443a-d821-11de-b50d-0019e336be3a	Baltic System Operator	BALTSO	Estonia	Lithuania	Latvia
09e8ed3a-7d7e-11de-9ae2-0019e336be3a	Bangladesh	BD	RoW Asia and Pacific
09d2df90-7d7e-11de-9ae2-0019e336be3a	Barbados	BB	RoW America
0f405034-7d7e-11de-9ae2-0019e336be3a	Belarus	BY	RoW Europe
0ff33cbc-7d7e-11de-9ae2-0019e336be3a	Belgium	BE	Belgium
09f36814-7d7e-11de-9ae2-0019e336be3a	Belize	BZ	RoW America
0a13f5c0-7d7e-11de-9ae2-0019e336be3a	Benin	BJ	RoW Africa
09d5d736-7d7e-11de-9ae2-0019e336be3a	Bermuda	BM	RoW America
0c67c0cc-7d7e-11de-9ae2-0019e336be3a	Bhutan	BT	RoW Asia and Pacific
09fd4f82-7d7e-11de-9ae2-0019e336be3a	Bolivia, Plurinational State of	BO	RoW America
cef71bbd-ab04-4959-ac3b-89a0c55e2e8c	Bonaire, Sint Eustatius, and Saba	BQ	RoW America
09f7dc00-7d7e-11de-9ae2-0019e336be3a	Bosnia and Herzegovina	BA	RoW Europe
12bee8d8-7d7e-11de-9ae2-0019e336be3a	Botswana	BW	RoW Africa
10b7703c-7d7e-11de-9ae2-0019e336be3a	Bouvet Island	BV	RoW Africa
0a2c8c66-7d7e-11de-9ae2-0019e336be3a	Brazil	BR	Brazil
251a2d08-d031-4589-9318-029ba543abde	Brazil, Acre	BR-AC	Brazil
4c05bd06-d401-45cd-b594-c1eafa0ef95b	Brazil, Alagoas	BR-AL	Brazil
744e0bff-1149-4c95-bea7-74792bc71a21	Brazil, Amapá	BR-AP	Brazil
12e2f855-d67d-492c-b59d-12205eeb79ea	Brazil, Amazonas	BR-AM	Brazil
929f1a52-bb4d-4a86-8439-6b01d8813196	Brazil, Bahia	BR-BA	Brazil
dc8836a3-1d91-49ed-b4b7-0482f7ec3eaf	Brazil, Ceará	BR-CE	Brazil
c65371a5-fd9a-4ca9-ae24-c4fde6615445	Brazil, Distrito Federal	BR-DF	Brazil
5d8ac1db-f842-4688-aba1-673c4f07b1dd	Brazil, Espírito Santo	BR-ES	Brazil
1a3d1ef6-b2f8-44b8-b51a-c82dec5f769b	Brazil, Goiás	BR-GO	Brazil
6eaa35ce-47d2-4c3d-9079-12adc7ffb375	Brazil, Maranhão	BR-MA	Brazil
64441fa1-0151-47ac-b97a-1fd886b90cae	Brazil, Mato Grosso	BR-MT	Brazil
23baa40a-53e2-4d6c-a61e-a412c2b7aaae	Brazil, Mato Grosso do Sul	BR-MS	Brazil
00e9e1a4-0cf8-4f07-8bad-fd782ed54382	Brazil, Minas Gerais	BR-MG	Brazil
3ece4ff8-55ae-40b2-baea-0d2bf2034fbf	Brazil, North-eastern grid	BR-North-eastern grid	Brazil
572aa631-8a25-4c16-b437-2ee0672c450d	Brazil, Northern grid	BR-Northern grid	Brazil
9a205fd8-72f3-423f-b3a7-6b805aaee30b	Brazil, Pará	BR-PA	Brazil
717c6f47-2eda-4d1b-8277-83f634ea7c23	Brazil, Paraíba	BR-PB	Brazil
3b2c2140-c25c-47c5-876d-78e5dc82f066	Brazil, Paraná	BR-PR	Brazil
a64ba70d-b110-4f81-b415-299c0c193faa	Brazil, Pernambuco	BR-PE	Brazil
70c9eee0-7dc4-4e2f-8dcc-f6bc4358ead9	Brazil, Piauí	BR-PI	Brazil
862723a2-2563-490a-9b7a-7206cb46fcb1	Brazil, Rio de Janeiro	BR-RJ	Brazil
8cd18b82-fdd2-4cf9-87c8-33e125b675f4	Brazil, Rio Grande do Norte	BR-RN	Brazil
2248c6cf-f68d-4dac-85bb-fac7e80064f6	Brazil, Rio Grande do Sul	BR-RS	Brazil
d9497730-f613-4d31-aab2-1d82add2d1bc	Brazil, Rondônia	BR-RO	Brazil
2a7e9ed2-4de5-4b28-9b4e-b12c50a1ed53	Brazil, Roraima	BR-RR	Brazil
4645f771-3596-4c42-ba0f-822d1ce2fb72	Brazil, Santa Catarina	BR-SC	Brazil
a7ba1868-375a-4d62-9048-bdf2136447c4	Brazil, São Paulo	BR-SP	Brazil
17a40e27-7f28-48c3-892d-6121e748ed01	Brazil, Sergipe	BR-SE	Brazil
a455d5bd-0e4f-4247-a4db-7cf88759f35f	Brazil, South-eastern and Mid-western grid	BR-South-eastern and Mid-western grid	Brazil
dd2330a8-30dc-4af9-bb3a-d2d2bf404dde	Brazil, Southern grid	BR-Southern grid	Brazil
54e71d4b-1d1f-473d-91db-15d40c496a6d	Brazil, Tocantins	BR-TO	Brazil
10c45112-7d7e-11de-9ae2-0019e336be3a	British Indian Ocean Territory	IO	RoW Asia and Pacific
0a4bff9c-7d7e-11de-9ae2-0019e336be3a	Brunei Darussalam	BN	RoW Asia and Pacific
0a46f524-7d7e-11de-9ae2-0019e336be3a	Bulgaria	BG	Bulgaria
1420c7f0-7d7e-11de-9ae2-0019e336be3a	Burkina Faso	BF	RoW Africa
0c33b64c-7d7e-11de-9ae2-0019e336be3a	Burundi	BI	RoW Africa
0c0d5768-7d7e-11de-9ae2-0019e336be3a	Cambodia	KH	RoW Asia and Pacific
0cb47d54-7d7e-11de-9ae2-0019e336be3a	Cameroon	CM	RoW Africa
0b2a8a96-7d7e-11de-9ae2-0019e336be3a	Canada	CA	Canada
39c8f992-22b7-4d59-9be0-eb461b36df2f	Canada without Alberta	Canada without Alberta	Canada
ae9d0b20-e4e3-4cd3-9699-63eca5319c9b	Canada without Alberta and Quebec	Canada without Alberta and Quebec	Canada
a4d7d7fd-94ae-4f44-91ba-53cd7f79bac4	Canada without Quebec	Canada without Quebec	Canada
6bf93cce-7c23-463e-9962-898efa030fa2	Canada, Alberta	CA-AB	Canada
533c318c-a189-4fc6-84a8-e9d48eab987c	Canada, British Columbia	CA-BC	Canada
aae610ca-cdef-4c81-9631-ded55d455444	Canada, Manitoba	CA-MB	Canada
b8ce14f4-e09b-4117-b4dd-d74af99da744	Canada, New Brunswick	CA-NB	Canada
92618f91-5370-41d9-b5d4-6a9d60b3239f	Canada, Newfoundland and Labrador	CA-NF	Canada
5fb3ee97-3981-4918-b09a-4de1b1fdb517	Canada, Northwest Territories	CA-NT	Canada
8cd8dbae-aa08-44b0-be67-6ed7e876cedd	Canada, Nova Scotia	CA-NS	Canada
1325cfa3-2b0d-487e-8d46-3e66b4b00f85	Canada, Nunavut	CA-NU	Canada
1d87302d-fd96-4acb-9f9f-d3389ba929b7	Canada, Ontario	CA-ON	Canada
b5b34218-bee7-4196-b70c-1b5ad433801a	Canada, Prince Edward Island	CA-PE	Canada
868a66d1-7428-4ba2-9125-253b07afc119	Canada, Québec	CA-QC	Canada
e3aa6506-9887-4e27-9102-b3671e430090	Canada, Saskatchewan	CA-SK	Canada
29dca13b-9d4b-4714-9c80-1808b9127dda	Canada, Yukon Territory	CA-YK	Canada
6a0f08e3-19ed-4748-a62f-f0920f99d65a	Canary Islands	Canary Islands	Spain
0cec2628-7d7e-11de-9ae2-0019e336be3a	Cape Verde	CV	RoW Africa
87b165cf-8b3c-4289-807e-4512b4fb2b2f	Caribbean	UN-CARIBBEAN	RoW America
0cb02330-7d7e-11de-9ae2-0019e336be3a	Cayman Islands	KY	RoW America
0cd759a0-7d7e-11de-9ae2-0019e336be3a	Central African Republic	CF	RoW Africa
fc467bec-d8f0-11de-b1d3-0019e336be3a	Central America	UN-CAMERICA	RoW America
11636ae9-23c9-4477-9e10-f4bc2767ebff	Central and Eastern Europe	EEU	Bulgaria	Czech Republic	Germany	Estonia	Croatia	Hungary	Lithuania	Latvia	Poland	Romania	Slovenia	Slovakia	RoW Europe
23ccc3fe-88d5-11de-99d3-0019e336be3a	Central Asia	Central Asia	RoW Asia and Pacific
fd95ae8c-7e2d-11de-9820-0019e336be3a	Central European Power Association	CENTREL	Austria	Belgium	Bulgaria	Croatia	Cyprus	Czech Republic	Denmark	Estonia	Finland	France	Germany	Greece	Hungary	Ireland	Italy	Latvia	Lithuania	Luxembourg	Netherlands	Norway	Poland	Portugal	Romania	Slovakia	Slovenia	Spain	Sweden	Switzerland	United Kingdom	RoW Europe
0cbbba9c-7d7e-11de-9ae2-0019e336be3a	Chad	TD	RoW Africa
0c852cde-7d7e-11de-9ae2-0019e336be3a	Chile	CL	RoW America
0c40fa1e-7d7e-11de-9ae2-0019e336be3a	China	CN	China
5b64ff1c-3c47-4adf-b89c-9e18078b9bf7	China Southern Power Grid	CSG	China
2f82cf2a-d2e0-4be3-b60c-399bfe93d403	China, Anhui (<U+5B89><U+5FBD>)	CN-AH	China
a7cf4239-43f5-4256-ae84-e94595cbaac6	China, Beijing (<U+5317><U+4EAC>)	CN-BJ	China
8bc809e8-f246-46f7-bf1f-93e34e06befd	China, Chongqing (<U+91CD><U+5E86>)	CN-CQ	China
7ac3c1e7-0b7d-4ff9-9aa5-0d67d7da37fa	China, Fujian (<U+798F><U+5EFA>)	CN-FJ	China
d5231e2f-479b-4f21-9173-35beeaf2406a	China, Gansu (<U+7518><U+8083>)	CN-GS	China
fbfd6cb0-56b1-4d0b-a13f-7f9f213f9afa	China, Guangdong (<U+5E7F><U+4E1C>)	CN-GD	China
c6b0afc2-8321-49aa-81f3-a793417eed91	China, Guangxi (<U+5E7F><U+897F><U+58EE><U+65CF><U+81EA><U+6CBB><U+533A>)	CN-GX	China
4a743c1d-f819-4398-b389-784b84de386e	China, Guizhou (<U+8D35><U+5DDE>)	CN-GZ	China
dd10b4f5-3c51-4c62-9b32-a111e15e3e52	China, Hainan (<U+6D77><U+5357>)	CN-HA	China
06bbed25-6ebe-48aa-9b92-300bddaeb2b7	China, Hebei (<U+6CB3><U+5317>)	CN-HB	China
0f7b1e31-0d0b-404a-994b-e3cd1b7586f0	China, Heilongjiang (<U+9ED1><U+9F99><U+6C5F><U+7701>)	CN-HL	China
bf7827a3-16a7-4a38-ad02-527898a12a7f	China, Henan (<U+6CB3><U+5357>)	CN-HE	China
2a19941e-dd11-44b4-919f-fb33c9150b71	China, Hubei (<U+6E56><U+5317>)	CN-HU	China
9923dac7-3164-4e2f-8723-f343d998072d	China, Hunan (<U+6E56><U+5357>)	CN-HN	China
da5d7825-8e05-4bad-b026-4204389cdef3	China, Inner Mongol (<U+5185><U+8499><U+53E4><U+81EA><U+6CBB><U+533A>)	CN-NM	China
dc5987d0-7a19-4843-82f1-15708e106edb	China, Jiangsu (<U+6C5F><U+82CF>)	CN-JS	China
f5c62675-f6ae-4bc4-8c9b-3b737ef2ea53	China, Jiangxi (<U+6C5F><U+897F>)	CN-JX	China
e58a4a8a-ca18-48d8-9023-3628de160e8e	China, Jilin (<U+5409><U+6797>)	CN-JL	China
13b215dc-598a-480e-98e6-13675076ac78	China, Liaoning (<U+8FBD><U+5B81>)	CN-LN	China
9e2f10b3-138f-4320-95a3-ea3853c5fbdd	China, Ningxia (<U+5B81><U+590F><U+56DE><U+65CF><U+81EA><U+6CBB><U+533A>)	CN-NX	China
06422af3-6431-4f6f-a555-7c0e008bce8b	China, Qinghai (<U+9752><U+6D77>)	CN-QH	China
232efb31-1dd5-4d00-87a8-5fa631021c17	China, Shaanxi (<U+9655><U+897F>)	CN-SA	China
2b2ddda2-bb8e-42f7-82e5-013cc04f7bc5	China, Shandong (<U+5C71><U+4E1C>)	CN-SD	China
4a15b2ab-5593-48d7-a7b9-b1c07c5ca99b	China, Shanghai (<U+4E0A><U+6D77>)	CN-SH	China
79abbd47-8e8b-4932-94c8-f3518ff110e9	China, Shanxi (<U+5C71><U+897F>)	CN-SX	China
1238ec0d-4167-453a-9ec5-50cfef0782a1	China, Sichuan (<U+56DB><U+5DDD>)	CN-SC	China
24c6336b-e160-4d2a-8d25-ac207a66f6c1	China, Tianjin (<U+5929><U+6D25>)	CN-TJ	China
e8a978ab-a183-4ce7-b791-760190d8a63c	China, Xinjiang (<U+65B0><U+7586><U+7EF4><U+543E><U+5C14><U+81EA><U+6CBB><U+533A>)	CN-XJ	China
c079ba9b-dc27-45f0-96b5-a3dd168de8ed	China, Xizang (<U+897F><U+85CF><U+81EA><U+6CBB><U+533A>)	CN-XZ	China
f41e84aa-2c80-451e-a7ab-594acc1b096d	China, Yunnan (<U+4E91><U+5357>)	CN-YN	China
a959ec4b-3db6-4b9f-9ea6-897fbcfdc610	China, Zhejiang (<U+6D59><U+6C5F>)	CN-ZJ	China
10c7c482-7d7e-11de-9ae2-0019e336be3a	Christmas Island	CX	RoW Asia and Pacific
e9f525be-34b8-45b6-9c33-5daf8b97fe7c	Clipperton Island	Clipperton Island	RoW America
102a1b92-7d7e-11de-9ae2-0019e336be3a	Cocos (Keeling) Islands	CC	RoW Asia and Pacific
0cc6c45a-7d7e-11de-9ae2-0019e336be3a	Colombia	CO	RoW America
14a80a4c-7e2a-11de-9820-0019e336be3a	Commonwealth of Independent States	FSU	Russia	RoW Asia and Pacific	RoW Europe
0cc14d18-7d7e-11de-9ae2-0019e336be3a	Comoros	KM	RoW Africa
0c193b28-7d7e-11de-9ae2-0019e336be3a	Congo	CG	RoW Africa
0c29d73a-7d7e-11de-9ae2-0019e336be3a	Congo, Democratic Republic of the	CD	RoW Africa
0cf01346-7d7e-11de-9ae2-0019e336be3a	Cook Islands	CK	RoW Asia and Pacific
2267ada9-09f7-4fc9-a93f-5b1e0086107e	Coral Sea Islands	Coral Sea Islands	RoW Asia and Pacific
0cd04f34-7d7e-11de-9ae2-0019e336be3a	Costa Rica	CR	RoW America
0ec6dff6-7d7e-11de-9ae2-0019e336be3a	Cote d'Ivoire	CI	RoW Africa
0e4ef37e-7d7e-11de-9ae2-0019e336be3a	Croatia	HR	Croatia
0ce31d3a-7d7e-11de-9ae2-0019e336be3a	Cuba	CU	RoW America
c08de0ce-64e7-4efb-a37f-8df754c262c8	Curaçao	CW	RoW America
0cf40280-7d7e-11de-9ae2-0019e336be3a	Cyprus	CY	Cyprus
4aa2a59b-aed0-4438-9db4-960357820659	Cyprus No Mans Area	Cyprus No Mans Area	Cyprus
0d45a5d6-7d7e-11de-9ae2-0019e336be3a	Czechia	CZ	Czech Republic
0cf950f0-7d7e-11de-9ae2-0019e336be3a	Denmark	DK	Denmark
0fe2ebfb-0eb4-4f42-8ec4-628d26f61f77	Dhekelia Sovereign Base Area	Dhekelia Base	Cyprus
0d0167a4-7d7e-11de-9ae2-0019e336be3a	Djibouti	DJ	RoW Africa
0d04edb6-7d7e-11de-9ae2-0019e336be3a	Dominica	DM	RoW America
0d083d04-7d7e-11de-9ae2-0019e336be3a	Dominican Republic	DO	RoW America
e3daf92a-88d2-11de-99d3-0019e336be3a	Eastern Africa	UN-EAFRICA	RoW Africa
2b57aeea-88d5-11de-99d3-0019e336be3a	Eastern Asia	UN-EASIA	RoW Asia and Pacific
50ec320c-88d5-11de-99d3-0019e336be3a	Eastern Europe	UN-EEUROPE	RoW Europe
0d0e72a0-7d7e-11de-9ae2-0019e336be3a	Ecuador	EC	RoW America
0d168940-7d7e-11de-9ae2-0019e336be3a	Egypt	EG	RoW Middle East
0d349e44-7d7e-11de-9ae2-0019e336be3a	El Salvador	SV	RoW America
0d245584-7d7e-11de-9ae2-0019e336be3a	Equatorial Guinea	GQ	RoW Africa
0d2ed0a4-7d7e-11de-9ae2-0019e336be3a	Eritrea	ER	RoW Africa
0d28a62a-7d7e-11de-9ae2-0019e336be3a	Estonia	EE	Estonia
0d3920fe-7d7e-11de-9ae2-0019e336be3a	Ethiopia	ET	RoW Africa
0723d252-7e2a-11de-9820-0019e336be3a	Europe	RER	Austria	Belgium	Bulgaria	Cyprus	Czech Republic	Germany	Denmark	Estonia	Spain	Finland	France	Greece	Croatia	Hungary	Ireland	Italy	Lithuania	Luxembourg	Latvia	Malta	Netherlands	Poland	Portugal	Romania	Sweden	Slovenia	Slovakia	United Kingdom	Switzerland	Norway	RoW Europe
c428af56-39c0-4dca-a617-8716b52a6640	Europe without Austria, Belgium, France, Germany, Italy, Liechtenstein, Monaco, San Marino, Switzerland, and the Vatican	RER w/o AT+BE+CH+DE+FR+IT	Bulgaria	Cyprus	Czech Republic	Denmark	Estonia	Spain	Finland	Greece	Croatia	Hungary	Ireland	Lithuania	Luxembourg	Latvia	Malta	Netherlands	Poland	Portugal	Romania	Sweden	Slovenia	Slovakia	United Kingdom	Norway	RoW Europe
5d5718f2-ee74-462a-888c-be4d534ef542	Europe without Germany and Switzerland	RER w/o CH+DE	Austria	Belgium	Bulgaria	Cyprus	Czech Republic	Denmark	Estonia	Spain	Finland	France	Greece	Croatia	Hungary	Ireland	Italy	Lithuania	Luxembourg	Latvia	Malta	Netherlands	Poland	Portugal	Romania	Sweden	Slovenia	Slovakia	United Kingdom	Norway	RoW Europe
ae85cec6-cc61-4a0d-a322-5fb10b6b4ece	Europe without Germany, the Netherlands, and Norway	RER w/o DE+NL+NO	Austria	Belgium	Bulgaria	Cyprus	Czech Republic	Denmark	Estonia	Spain	Finland	France	Greece	Croatia	Hungary	Ireland	Italy	Lithuania	Luxembourg	Latvia	Malta	Poland	Portugal	Romania	Sweden	Slovenia	Slovakia	United Kingdom	Switzerland	RoW Europe
5c322a16-89ab-48d4-b1a2-fec5759774a3	Europe without Germany, the Netherlands, and Russia	RER w/o DE+NL+RU	Austria	Belgium	Bulgaria	Cyprus	Czech Republic	Denmark	Estonia	Spain	Finland	France	Greece	Croatia	Hungary	Ireland	Italy	Lithuania	Luxembourg	Latvia	Malta	Poland	Portugal	Romania	Sweden	Slovenia	Slovakia	United Kingdom	Switzerland	Norway	RoW Europe
8bd484ff-ec4e-45c6-9f61-e211a872a4ff	Europe without Germany, the Netherlands, Norway, and Russia	RER w/o DE+NL+NO+RU	Austria	Belgium	Bulgaria	Cyprus	Czech Republic	Denmark	Estonia	Spain	Finland	France	Greece	Croatia	Hungary	Ireland	Italy	Lithuania	Luxembourg	Latvia	Malta	Poland	Portugal	Romania	Sweden	Slovenia	Slovakia	United Kingdom	Switzerland	RoW Europe
a2d4e588-e0d1-11de-823b-0019e336be3a	Europe without NORDEL (NCPA)	Europe without NORDEL (NCPA)	Denmark	Finland	Sweden	Norway
f9221622-cc45-11de-98ed-0019e336be3a	Europe without Switzerland	Europe without Switzerland	Austria	Belgium	Bulgaria	Cyprus	Czech Republic	Germany	Denmark	Estonia	Spain	Finland	France	Greece	Croatia	Hungary	Ireland	Italy	Lithuania	Luxembourg	Latvia	Malta	Netherlands	Poland	Portugal	Romania	Sweden	Slovenia	Slovakia	United Kingdom	Norway	RoW Europe
6a1e0054-4990-4d43-b7e4-e3d9a595a275	Europe without Switzerland and France	Europe without Switzerland and France	Austria	Belgium	Bulgaria	Cyprus	Czech Republic	Germany	Denmark	Estonia	Spain	Finland	Greece	Croatia	Hungary	Ireland	Italy	Lithuania	Luxembourg	Latvia	Malta	Netherlands	Poland	Portugal	Romania	Sweden	Slovenia	Slovakia	United Kingdom	Norway	RoW Europe
f2d812a2-e631-11de-ba56-0019e336be3a	Europe, UN Region	UN-EUROPE	Austria	Belgium	Bulgaria	Cyprus	Czech Republic	Germany	Denmark	Estonia	Spain	Finland	France	Greece	Croatia	Hungary	Ireland	Italy	Lithuania	Luxembourg	Latvia	Malta	Netherlands	Poland	Portugal	Romania	Sweden	Slovenia	Slovakia	United Kingdom	Switzerland	Norway	RoW Europe	Russia
c670b4a0-6051-4935-bafe-866736a010a9	Europe, without Russia and Turkey	Europe, without Russia and Turkey	Austria	Belgium	Bulgaria	Cyprus	Czech Republic	Germany	Denmark	Estonia	Spain	Finland	France	Greece	Croatia	Hungary	Ireland	Italy	Lithuania	Luxembourg	Latvia	Malta	Netherlands	Poland	Portugal	Romania	Sweden	Slovenia	Slovakia	United Kingdom	Switzerland	Norway	RoW Europe
f87aa98c-d820-11de-a736-0019e336be3a	European Network of Transmission Systems Operators for Electricity	ENTSO-E	Austria	Belgium	Bulgaria	Croatia	Cyprus	Czech Republic	Denmark	Estonia	Finland	France	Germany	Greece	Hungary	Ireland	Italy	Latvia	Lithuania	Luxembourg	Netherlands	Norway	Poland	Portugal	Romania	Slovakia	Slovenia	Spain	Sweden	Switzerland	United Kingdom	RoW Europe
0d627bf2-7d7e-11de-9ae2-0019e336be3a	Falkland Islands (Malvinas)	FK	RoW America
0fff8e5e-7d7e-11de-9ae2-0019e336be3a	Faroe Islands	FO	RoW Europe
0d5bcf64-7d7e-11de-9ae2-0019e336be3a	Fiji	FJ	RoW Asia and Pacific
0d512a50-7d7e-11de-9ae2-0019e336be3a	Finland	FI	Finland
dfd92cab-e7c7-4ca8-8abc-2fb6fd064dbc	Florida Reliability Coordinating Council	FRCC	United States
0d751636-7d7e-11de-9ae2-0019e336be3a	France	FR	France
28d52c97-56c5-4bcd-9504-ccc5b4797c67	France, including overseas territories	France, including overseas territories	France
0d4ac2be-7d7e-11de-9ae2-0019e336be3a	French Guiana	GF	RoW America
0d6d36be-7d7e-11de-9ae2-0019e336be3a	French Polynesia	PF	RoW Asia and Pacific
10bb74b6-7d7e-11de-9ae2-0019e336be3a	French Southern Territories	TF	RoW Africa
0d8399c2-7d7e-11de-9ae2-0019e336be3a	Gabon	GA	RoW Africa
0d7e9abc-7d7e-11de-9ae2-0019e336be3a	Gambia	GM	RoW Africa
0d8feaa6-7d7e-11de-9ae2-0019e336be3a	Georgia	GE	RoW Asia and Pacific
0e0e1020-7d7e-11de-9ae2-0019e336be3a	Germany	DE	Germany
0d95a34c-7d7e-11de-9ae2-0019e336be3a	Ghana	GH	RoW Africa
10061efe-7d7e-11de-9ae2-0019e336be3a	Gibraltar	GI	United Kingdom
34dbbff8-88ce-11de-ad60-0019e336be3a	Global	GLO	Austria	Belgium	Bulgaria	Cyprus	Czech Republic	Germany	Denmark	Estonia	Spain	Finland	France	Greece	Croatia	Hungary	Ireland	Italy	Lithuania	Luxembourg	Latvia	Malta	Netherlands	Poland	Portugal	Romania	Sweden	Slovenia	Slovakia	United Kingdom	United States	Japan	China	Canada	South Korea	Brazil	India	Mexico	Russia	Australia	Switzerland	Turkey	Taiwan	Norway	Indonesia	South Africa	RoW Asia and Pacific	RoW America	RoW Europe
0e22b962-7d7e-11de-9ae2-0019e336be3a	Greece	GR	Greece
0dc048d6-7d7e-11de-9ae2-0019e336be3a	Greenland	GL	Denmark
0d9a9384-7d7e-11de-9ae2-0019e336be3a	Grenada	GD	RoW America
14f2285e-7d7e-11de-9ae2-0019e336be3a	Guadeloupe	GP	RoW America
0e1a52e0-7d7e-11de-9ae2-0019e336be3a	Guam	GU	RoW Asia and Pacific
0e2fbd60-7d7e-11de-9ae2-0019e336be3a	Guatemala	GT	RoW America
1541988a-7d7e-11de-9ae2-0019e336be3a	Guernsey	GG	RoW Europe
0e34b6f8-7d7e-11de-9ae2-0019e336be3a	Guinea	GN	RoW Africa
11738740-7d7e-11de-9ae2-0019e336be3a	Guinea-Bissau	GW	RoW Africa
0e3b3d98-7d7e-11de-9ae2-0019e336be3a	Guyana	GY	RoW America
0e422e82-7d7e-11de-9ae2-0019e336be3a	Haiti	HT	RoW America
10c0fae4-7d7e-11de-9ae2-0019e336be3a	Heard Island and McDonald Islands	HM	RoW Asia and Pacific
598f9aa4-e409-11de-bce5-0019e336be3a	HICC	HICC	United States
15265aa2-7d7e-11de-9ae2-0019e336be3a	Holy See (Vatican City State)	VA	RoW Europe
0e4809f6-7d7e-11de-9ae2-0019e336be3a	Honduras	HN	RoW America
0ff7be54-7d7e-11de-9ae2-0019e336be3a	Hong Kong	HK	RoW Asia and Pacific
0e56bc44-7d7e-11de-9ae2-0019e336be3a	Hungary	HU	Hungary
4484cb2d-50e8-43a0-a79f-80313021306a	IAI Area, Africa	IAI Area, Africa	South Africa	RoW Africa
77b2f7ee-3f79-4946-a2d7-50c46d1756d2	IAI Area, Asia, without China and GCC	IAI Area, Asia, without China and GCC	Japan	South Korea	India	Taiwan	Indonesia	RoW Asia and Pacific
b7fcfda9-0add-49aa-87d4-d60f3bda4283	IAI Area, EU27 & EFTA	IAI Area, EU27 & EFTA	Austria	Belgium	Bulgaria	Cyprus	Czech Republic	Germany	Denmark	Estonia	Spain	Finland	France	Greece	Croatia	Hungary	Ireland	Italy	Lithuania	Luxembourg	Latvia	Malta	Netherlands	Poland	Portugal	Romania	Sweden	Slovenia	Slovakia	United Kingdom	Switzerland	Norway	RoW Europe
058885d6-d0a9-48ff-8d95-4baacf75ce97	IAI Area, Gulf Cooperation Council	IAI Area, Gulf Cooperation Council	RoW Middle East
446707ca-ceb0-4e24-b794-73e95e6154c0	IAI Area, North America	IAI Area, North America	United States	Canada	Mexico
4a81aea7-bf37-4c83-ac1e-9a2050f88920	IAI Area, North America, without Quebec	IAI Area, North America, without Quebec	United States	Canada	Mexico
0fc981f0-eb14-436c-834f-c6ce005a4dc4	IAI Area, Russia & Europe outside EU27 & EFTA	IAI Area, Russia & RER w/o EU27 & EFTA	Russia	RoW Europe
f3b8b2cb-5fd9-4cfc-b947-783a102c739e	IAI Area, South America	IAI Area, South America	Brazil	RoW America
dc8d48a0-e8ab-494f-a2a2-270ef43cef95	IAI Area, West Europe	IAI Area, West Europe	Austria	Belgium	Germany	France	Ireland	Luxembourg	Netherlands	United Kingdom	Switzerland
0e5d5856-7d7e-11de-9ae2-0019e336be3a	Iceland	IS	RoW Europe
0e6a7860-7d7e-11de-9ae2-0019e336be3a	India	IN	India
7661383e-998b-4738-b8dc-9e1e60070c8a	India, Andaman and Nicobar	IN-AN	India
888f6bc1-22f6-486b-b2f3-814672df6930	India, Andhra Pradesh	IN-AP	India
28388907-7605-469a-b28d-cdc8f963b28b	India, Arunachal Pradesh	IN-AR	India
d0145549-5ad2-4cc6-8e5b-c6ed6223d2db	India, Assam	IN-AS	India
5ba6d534-2083-4167-975d-84579c9e5202	India, Bihar	IN-BR	India
1b5afe13-e071-4c8a-81b5-68eb8982053f	India, Chandigarh	IN-CH	India
89f88c37-befd-49fa-92ad-35875a6709eb	India, Chhattisgarh	IN-CT	India
d766dc54-3e8f-4ac4-8a0f-69707a338b33	India, Dadra and Nagar Haveli	IN-DN	India
653869da-6e3f-476e-9380-19d23040f2b9	India, Daman and Diu	IN-DD	India
de26c625-ae68-4c9e-8fde-a6c33b3dfe14	India, Delhi	IN-DL	India
1eb1f8b3-8c35-425e-94ca-cf502eb004c3	India, Eastern grid	IN-Eastern grid	India
567cc8ea-05d0-4d27-a509-89f10e1a280e	India, Goa	IN-GA	India
0d325613-94aa-4a65-8014-d3f6ead19eb3	India, Gujarat	IN-GJ	India
3f1442fa-0808-438c-a355-2a1e96f9adeb	India, Haryana	IN-HR	India
763ca99d-f561-45ef-8d36-84cb877f9c08	India, Himachal Pradesh	IN-HP	India
4a07e727-a1e5-4079-8433-b1d2b5ed544c	India, Islands	IN-Islands	India
d8cc1385-8b61-4509-8db0-d9cb5fa95725	India, Jammu and Kashmir	IN-JK	India
2221b78c-5a1c-454c-a637-744d54a0bbe9	India, Jharkhand	IN-JH	India
c23d9dc6-d794-4775-8e92-ee830a084a7f	India, Karnataka	IN-KA	India
518f1827-fe70-400e-b521-48f2f72fd777	India, Kerala	IN-KL	India
dee052a0-3714-41b6-86c0-79d062704c25	India, Lakshadweep	IN-LD	India
b3d19998-fe81-4783-a19e-408d7424d876	India, Madhya Pradesh	IN-MP	India
14bfff77-d5a0-4ad5-9936-58636c295e99	India, Maharashtra	IN-MH	India
d6bf166c-b5aa-45a6-b0e9-7c169d2c7cbc	India, Manipur	IN-MN	India
10988ebe-8be4-43c6-8451-3273ca12cd47	India, Meghalaya	IN-ML	India
cab4fbd7-e8ae-4ea6-9e74-0e41df667c61	India, Mizoram	IN-MZ	India
df16b2b2-c49e-4560-9b74-cbcbe0a8d281	India, Nagaland	IN-NL	India
26e353a9-dac6-4123-833d-75cd720d9e19	India, North-eastern grid	IN-North-eastern grid	India
59003ab7-b40a-43ac-b7c9-3e3e8907803e	India, Northern grid	IN-Northern grid	India
bf61f94b-cbd6-4a41-9c8b-0ef2b4e06c3c	India, Orissa	IN-OR	India
f7228566-0785-45da-b946-01f82d277dda	India, Puducherry	IN-PY	India
83cdc953-e485-453b-a8f9-749f92aca417	India, Punjab	IN-PB	India
4024933b-d7a2-4ebb-87dc-80460ff13c50	India, Rajasthan	IN-RJ	India
01c44dfa-113d-427b-81b9-1d4fde230f93	India, Sikkim	IN-SK	India
8a80d1d2-de76-44e0-a3d3-46b98c053ca1	India, Southern grid	IN-Southern grid	India
eb2442cf-93eb-4784-99f9-7a0c97c3576f	India, Tamil Nadu	IN-TN	India
001c936c-cf14-46dd-a99e-b1ef30f51c96	India, Tripura	IN-TR	India
ae2be714-8cbe-4abd-afac-a5e7ca2b0d55	India, Uttar Pradesh	IN-UP	India
6859dfd7-168b-4a36-9429-e0e884bff83a	India, Uttarakhand	IN-UT	India
77849b53-31ea-4b25-93e5-451909753ad3	India, West Bengal	IN-WB	India
25457a88-a525-4fd8-b73d-72fd3f37fc74	India, Western grid	IN-Western grid	India
946938ce-9c81-4a3c-a6ce-ce60a931c602	Indian Ocean Territories	Indian Ocean Territories	RoW Asia and Pacific
14ba15f4-7d7e-11de-9ae2-0019e336be3a	Indonesia	ID	Indonesia
0ea9e766-7d7e-11de-9ae2-0019e336be3a	Iran (Islamic Republic of)	IR	RoW Middle East
0ecd6952-7d7e-11de-9ae2-0019e336be3a	Iraq	IQ	RoW Middle East
0d1de104-7d7e-11de-9ae2-0019e336be3a	Ireland	IE	Ireland
1009d666-7d7e-11de-9ae2-0019e336be3a	Isle of Man	IM	RoW Europe
0eb3bcbe-7d7e-11de-9ae2-0019e336be3a	Israel	IL	RoW Middle East
0ebb28b4-7d7e-11de-9ae2-0019e336be3a	Italy	IT	Italy
0eed3c64-7d7e-11de-9ae2-0019e336be3a	Jamaica	JM	RoW America
0ed905c8-7d7e-11de-9ae2-0019e336be3a	Japan	JP	Japan
1544d680-7d7e-11de-9ae2-0019e336be3a	Jersey	JE	RoW Europe
0ef0fe6c-7d7e-11de-9ae2-0019e336be3a	Jordan	JO	RoW Middle East
0f1fdb74-7d7e-11de-9ae2-0019e336be3a	Kazakhstan	KZ	RoW Asia and Pacific
0ef4e126-7d7e-11de-9ae2-0019e336be3a	Kenya	KE	RoW Africa
0f0882c6-7d7e-11de-9ae2-0019e336be3a	Kiribati	KI	RoW Asia and Pacific
0f0215a8-7d7e-11de-9ae2-0019e336be3a	Korea, Democratic People's Republic of	KP	RoW Asia and Pacific
0f0f980e-7d7e-11de-9ae2-0019e336be3a	Korea, Republic of	KR	South Korea
ca32e3be-5acc-4486-88cf-731cdff3b9c5	Kosovo	XK	RoW Europe
0f16e870-7d7e-11de-9ae2-0019e336be3a	Kuwait	KW	RoW Middle East
0efacce4-7d7e-11de-9ae2-0019e336be3a	Kyrgyzstan	KG	RoW Asia and Pacific
0f2f07ac-7d7e-11de-9ae2-0019e336be3a	Lao People's Democratic Republic	LA	RoW Asia and Pacific
09db3260-7e2a-11de-9820-0019e336be3a	Latin America and the Caribbean	RLA	Brazil	RoW America
0f3a36f4-7d7e-11de-9ae2-0019e336be3a	Latvia	LV	Latvia
0f35d820-7d7e-11de-9ae2-0019e336be3a	Lebanon	LB	RoW Middle East
12ba54da-7d7e-11de-9ae2-0019e336be3a	Lesotho	LS	RoW Africa
0f4c70f8-7d7e-11de-9ae2-0019e336be3a	Liberia	LR	RoW Africa
0f59bb46-7d7e-11de-9ae2-0019e336be3a	Libya	LY	RoW Africa
0f55e480-7d7e-11de-9ae2-0019e336be3a	Liechtenstein	LI	RoW Europe
0f46d4ea-7d7e-11de-9ae2-0019e336be3a	Lithuania	LT	Lithuania
100cd4b0-7d7e-11de-9ae2-0019e336be3a	Luxembourg	LU	Luxembourg
10105c52-7d7e-11de-9ae2-0019e336be3a	Macau	MO	RoW Asia and Pacific
0f78e944-7d7e-11de-9ae2-0019e336be3a	Macedonia, the Former Yugoslav Republic of	MK	RoW Europe
0f6066da-7d7e-11de-9ae2-0019e336be3a	Madagascar	MG	RoW Africa
0fd0c588-7d7e-11de-9ae2-0019e336be3a	Malawi	MW	RoW Africa
0fbd80a4-7d7e-11de-9ae2-0019e336be3a	Malaysia	MY	RoW Asia and Pacific
0f9f2f00-7d7e-11de-9ae2-0019e336be3a	Maldives	MV	RoW America
0f7d8030-7d7e-11de-9ae2-0019e336be3a	Mali	ML	RoW Africa
0f9402ce-7d7e-11de-9ae2-0019e336be3a	Malta	MT	Malta
15099fa2-7d7e-11de-9ae2-0019e336be3a	Marshall Islands	MH	RoW Asia and Pacific
0f671a66-7d7e-11de-9ae2-0019e336be3a	Martinique	MQ	RoW America
0f8e6c2e-7d7e-11de-9ae2-0019e336be3a	Mauritania	MR	RoW Africa
0f8a5012-7d7e-11de-9ae2-0019e336be3a	Mauritius	MU	RoW Africa
10207fa6-7d7e-11de-9ae2-0019e336be3a	Mayotte	YT	RoW Africa
13fd916a-e62c-11de-ba56-0019e336be3a	Melanesia	UN-MELANESIA	RoW Asia and Pacific
0fa9a53e-7d7e-11de-9ae2-0019e336be3a	Mexico	MX	Mexico
26bf514e-e62c-11de-ba56-0019e336be3a	Micronesia	UN-MICRONESIA	RoW Asia and Pacific
0d684cbc-7d7e-11de-9ae2-0019e336be3a	Micronesia, Federated States of	FM	RoW Asia and Pacific
e60b420e-88d2-11de-99d3-0019e336be3a	Middle Africa	UN-MAFRICA	RoW Africa
fd6f25d2-7e2d-11de-9820-0019e336be3a	Middle East	RME	RoW Middle East
39185d7c-a546-424b-8605-6bc8e94e109f	Midwest Reliability Organization	MRO	United States
6432879f-dc31-4e80-bc55-573f72dafee8	Midwest Reliability Organization, US part only	MRO, US only	United States
1188faee-7d7e-11de-9ae2-0019e336be3a	Moldova, Republic of	MD	RoW Europe
1013310c-7d7e-11de-9ae2-0019e336be3a	Monaco	MC	RoW Europe
0f6c1a98-7d7e-11de-9ae2-0019e336be3a	Mongolia	MN	RoW Asia and Pacific
101cf458-7d7e-11de-9ae2-0019e336be3a	Montenegro	ME	RoW Europe
0f759550-7d7e-11de-9ae2-0019e336be3a	Montserrat	MS	RoW America
0f848e98-7d7e-11de-9ae2-0019e336be3a	Morocco	MA	RoW Africa
0fc883d2-7d7e-11de-9ae2-0019e336be3a	Mozambique	MZ	RoW Africa
0a06dd7c-7d7e-11de-9ae2-0019e336be3a	Myanmar	MM	RoW Asia and Pacific
145e04ee-7d7e-11de-9ae2-0019e336be3a	Namibia	NA	RoW Africa
11148498-7d7e-11de-9ae2-0019e336be3a	Nauru	NR	RoW Asia and Pacific
110f1ea4-7d7e-11de-9ae2-0019e336be3a	Nepal	NP	RoW Asia and Pacific
10df2fe6-7d7e-11de-9ae2-0019e336be3a	Netherlands	NL	Netherlands
0fdb5bec-7d7e-11de-9ae2-0019e336be3a	New Caledonia	NC	RoW Asia and Pacific
11258d1a-7d7e-11de-9ae2-0019e336be3a	New Zealand	NZ	RoW Asia and Pacific
111cdba2-7d7e-11de-9ae2-0019e336be3a	Nicaragua	NI	RoW America
0fe7b522-7d7e-11de-9ae2-0019e336be3a	Niger	NE	RoW Africa
10d6bc3a-7d7e-11de-9ae2-0019e336be3a	Nigeria	NG	RoW Africa
0fe1621c-7d7e-11de-9ae2-0019e336be3a	Niue	NU	RoW Asia and Pacific
fe0113e8-7e2d-11de-9820-0019e336be3a	Nordic Countries Power Association	NORDEL	Denmark	Finland	Sweden	Norway
10271ce4-7d7e-11de-9ae2-0019e336be3a	Norfolk Island	NF	RoW America
047116e2-d932-11de-9627-0019e336be3a	North American Free Trade Agreement	NAFTA	United States	Canada	Mexico
d48cee40-0ff1-49d6-a80d-9e0be3e0c2f6	Northeast Power Coordinating Council	NPCC	United States
50f826e7-ab13-444e-987b-180701b691c9	Northeast Power Coordinating Council, US part only	NPCC, US only	United States
e675a82e-88d2-11de-99d3-0019e336be3a	Northern Africa	UN-NAFRICA	RoW Africa
0fecb5e8-7e2a-11de-9820-0019e336be3a	Northern America	RNA	United States	Canada	Mexico
92f428e3-0631-408a-bb78-7cc010f272ca	Northern Cyprus	Northern Cyprus	Cyprus
548bd19c-88d5-11de-99d3-0019e336be3a	Northern Europe	UN-NEUROPE	Denmark	Estonia	Finland	Lithuania	Latvia	Sweden	Norway
0ffb63d8-7d7e-11de-9ae2-0019e336be3a	Northern Mariana Islands	MP	RoW Asia and Pacific
10f1ec30-7d7e-11de-9ae2-0019e336be3a	Norway	NO	Norway
9232290c-e62b-11de-ba56-0019e336be3a	Oceania	UN-OCEANIA	RoW Asia and Pacific
0f980b80-7d7e-11de-9ae2-0019e336be3a	Oman	OM	RoW Middle East
11430eee-7d7e-11de-9ae2-0019e336be3a	Pakistan	PK	RoW Asia and Pacific
1505b46e-7d7e-11de-9ae2-0019e336be3a	Palau	PW	RoW Asia and Pacific
1019325a-7d7e-11de-9ae2-0019e336be3a	Palestinian Territory, Occupied	PS	RoW Middle East
115546c2-7d7e-11de-9ae2-0019e336be3a	Panama	PA	RoW America
11663ae0-7d7e-11de-9ae2-0019e336be3a	Papua New Guinea	PG	RoW Asia and Pacific
11311298-7d7e-11de-9ae2-0019e336be3a	Paraguay	PY	RoW America
11387d6c-7d7e-11de-9ae2-0019e336be3a	Peru	PE	RoW America
119679bc-7d7e-11de-9ae2-0019e336be3a	Philippines	PH	RoW Asia and Pacific
150266d8-7d7e-11de-9ae2-0019e336be3a	Pitcairn	PN	RoW Asia and Pacific
114ebb04-7d7e-11de-9ae2-0019e336be3a	Poland	PL	Poland
4d22983c-e62c-11de-ba56-0019e336be3a	Polynesia	UN-POLYNESIA	RoW Asia and Pacific
115c647a-7d7e-11de-9ae2-0019e336be3a	Portugal	PT	Portugal
11a7c1a4-7d7e-11de-9ae2-0019e336be3a	Puerto Rico	PR	RoW America
117936fe-7d7e-11de-9ae2-0019e336be3a	Qatar	QA	RoW Middle East
c231d8f9-39e9-408c-9884-8508b8f9baf7	Québec, Hydro-Québec distribution network	Québec, HQ distribution network	Canada
42e6cfaf-ffa3-4f42-85bb-55e1b1c40c56	ReliabilityFirst Corporation	RFC	United States
7846b897-7c04-4f9f-b607-2b83fcd9a74c	Rest-of-World	RoW
117d1850-7d7e-11de-9ae2-0019e336be3a	Reunion	RE	RoW Africa
11813638-7d7e-11de-9ae2-0019e336be3a	Romania	RO	Romania
12143bfe-7d7e-11de-9ae2-0019e336be3a	Russia	RU	Russia
6d696e3b-ac91-486c-8f04-349c496915ae	Russia (Asia)	Russia (Asia)	Russia
1cfaa6a1-259a-442f-80ca-1070cfbbf6da	Russia (Europe)	Russia (Europe)	Russia
129718da-7d7e-11de-9ae2-0019e336be3a	Rwanda	RW	RoW Africa
153e85be-7d7e-11de-9ae2-0019e336be3a	Saint Barthelemy	BL	RoW America
1510fb80-7d7e-11de-9ae2-0019e336be3a	Saint Helena	SH	RoW America
12a2ee3a-7d7e-11de-9ae2-0019e336be3a	Saint Kitts and Nevis	KN	RoW America
12f2d954-7d7e-11de-9ae2-0019e336be3a	Saint Lucia	LC	RoW America
153b614a-7d7e-11de-9ae2-0019e336be3a	Saint Martin	MF	RoW America
150dbd3a-7d7e-11de-9ae2-0019e336be3a	Saint Pierre and Miquelon	PM	RoW America
1436d536-7d7e-11de-9ae2-0019e336be3a	Saint Vincent and the Grenadines	VC	RoW America
14679ce8-7d7e-11de-9ae2-0019e336be3a	Samoa	WS	RoW Asia and Pacific
15146d88-7d7e-11de-9ae2-0019e336be3a	San Marino	SM	RoW Europe
133bfb7a-7d7e-11de-9ae2-0019e336be3a	Sao Tome and Principe	ST	RoW America
129c6a88-7d7e-11de-9ae2-0019e336be3a	Saudi Arabia	SA	RoW Middle East
aa97629e-e94b-4270-a042-979d38785ecd	Scarborough Reef	Scarborough Reef	RoW Asia and Pacific
12c6a37a-7d7e-11de-9ae2-0019e336be3a	Senegal	SN	RoW Africa
1520c2a4-7d7e-11de-9ae2-0019e336be3a	Serbia	RS	RoW Europe
4eb91d59-44f6-4ec6-9f21-0c48bcf3becf	Serbia and Montenegro	CS	RoW Europe
a7b38401-afb6-4130-86f6-cd5184c6c40e	SERC Reliability Corporation	SERC	United States
c692fbb4-53d5-4e63-920d-361e98c90dab	Serranilla Bank	Serranilla Bank	RoW America
12a65db8-7d7e-11de-9ae2-0019e336be3a	Seychelles	SC	RoW Africa
3dc3c9af-74a3-472e-8af9-070146a3eec9	Siachen Glacier	Siachen Glacier	RoW Asia and Pacific
12d57c60-7d7e-11de-9ae2-0019e336be3a	Sierra Leone	SL	RoW Africa
12dcac1a-7d7e-11de-9ae2-0019e336be3a	Singapore	SG	RoW Asia and Pacific
4c344fd5-a67d-412e-adb4-f3191817011f	Sint Maarten, Dutch part	SX	RoW America
0f515f00-7d7e-11de-9ae2-0019e336be3a	Slovakia	SK	Slovakia
12d0bd4c-7d7e-11de-9ae2-0019e336be3a	Slovenia	SI	Slovenia
0a1ab78e-7d7e-11de-9ae2-0019e336be3a	Solomon Islands	SB	RoW Asia and Pacific
12e2e22e-7d7e-11de-9ae2-0019e336be3a	Somalia	SO	RoW Africa
6d7964cb-db0a-4b40-b975-b5d4d6bdb331	Somaliland	Somaliland	RoW Africa
12b21766-7d7e-11de-9ae2-0019e336be3a	South Africa	ZA	South Africa
1ae80e7c-e5e3-11de-a739-0019e336be3a	South America	UN-SAMERICA	Brazil	RoW America
30e68c9c-7e2a-11de-9820-0019e336be3a	South Asia	SAS	RoW Asia and Pacific
154830be-7d7e-11de-9ae2-0019e336be3a	South Georgia and the South Sandwich Islands	GS	RoW America
cff5fe64-d6cf-4256-8bd0-428dc0f104f6	South Sudan	SS	RoW Africa
4aff9c9e-88d5-11de-99d3-0019e336be3a	South-Eastern Asia	UN-SEASIA	RoW Asia and Pacific
e6d3af00-88d2-11de-99d3-0019e336be3a	Southern Africa	UN-SASIA	RoW Africa
57c8c52c-88d5-11de-99d3-0019e336be3a	Southern Europe	UN-SEUROPE	Greece	Croatia	Italy	Malta	Portugal	Slovenia	Spain
79565b15-098f-471f-aa28-d7dd611657db	Southwest Power Pool	SPP	United States
12ea642c-7d7e-11de-9ae2-0019e336be3a	Spain	ES	Spain
6ba95ea2-6963-4dad-aa26-a5b45785e7f0	Spratly Islands	Spratly Islands	RoW Asia and Pacific
0c13823c-7d7e-11de-9ae2-0019e336be3a	Sri Lanka	LK	RoW Asia and Pacific
4c9baec2-f9fc-4f36-84f7-a3ed2eab82a1	State Grid Corporation of China	SGCC	China
12f773b0-7d7e-11de-9ae2-0019e336be3a	Sudan	SD	RoW Africa
1117f7f4-7d7e-11de-9ae2-0019e336be3a	Suriname	SR	RoW America
152d7e40-7d7e-11de-9ae2-0019e336be3a	Svalbard and Jan Mayen	SJ	Norway
146af956-7d7e-11de-9ae2-0019e336be3a	Swaziland	SZ	RoW Africa
1301c428-7d7e-11de-9ae2-0019e336be3a	Sweden	SE	Sweden
131278d6-7d7e-11de-9ae2-0019e336be3a	Switzerland	CH	Switzerland
130d4f28-7d7e-11de-9ae2-0019e336be3a	Syrian Arab Republic	SY	RoW Middle East
154d2934-7d7e-11de-9ae2-0019e336be3a	Taiwan, Province of China	TW	Taiwan
13293cec-7d7e-11de-9ae2-0019e336be3a	Tajikistan	TJ	RoW Asia and Pacific
13615776-7d7e-11de-9ae2-0019e336be3a	Tanzania, United Republic Of	TZ	RoW Africa
854cdfab-82bf-4c25-8515-ba33589d3efe	Texas Regional Entity	TRE	United States
131dd2ee-7d7e-11de-9ae2-0019e336be3a	Thailand	TH	RoW Asia and Pacific
14fec0f0-7d7e-11de-9ae2-0019e336be3a	Timor-Leste	TL	RoW Asia and Pacific
1337d22a-7d7e-11de-9ae2-0019e336be3a	Togo	TG	RoW Africa
132fcda0-7d7e-11de-9ae2-0019e336be3a	Tokelau	TK	RoW Asia and Pacific
13335286-7d7e-11de-9ae2-0019e336be3a	Tonga	TO	RoW Asia and Pacific
1317a572-7d7e-11de-9ae2-0019e336be3a	Trinidad and Tobago	TT	RoW America
133fc02a-7d7e-11de-9ae2-0019e336be3a	Tunisia	TN	RoW Africa
1347b0a0-7d7e-11de-9ae2-0019e336be3a	Turkey	TR	RoW Middle East
1356be2e-7d7e-11de-9ae2-0019e336be3a	Turkmenistan	TM	RoW Asia and Pacific
15177c76-7d7e-11de-9ae2-0019e336be3a	Turks and Caicos Islands	TC	RoW America
1351b0f0-7d7e-11de-9ae2-0019e336be3a	Tuvalu	TV	RoW Asia and Pacific
26c31b7c-e0d1-11de-823b-0019e336be3a	UCTE without France	UCTE without France	Luxembourg	Croatia	Slovenia	Slovakia	Denmark	Hungary	Austria	Sweden	Belgium	Netherlands	Czech Republic	Greece	Bulgaria	Germany	Ireland	Italy	Romania	Portugal	Poland	Spain
dde7310e-e0d0-11de-823b-0019e336be3a	UCTE without Germany	UCTE without Germany	Luxembourg	Croatia	Slovenia	Slovakia	Denmark	Hungary	Austria	Sweden	Belgium	Netherlands	Czech Republic	Greece	Bulgaria	France	Ireland	Italy	Romania	Portugal	Poland	Spain
088a91da-e0cc-11de-823b-0019e336be3a	UCTE without Germany and France	UCTE without Germany and France	Luxembourg	Croatia	Slovenia	Slovakia	Denmark	Hungary	Austria	Sweden	Belgium	Netherlands	Czech Republic	Greece	Bulgaria	Ireland	Italy	Romania	Portugal	Poland	Spain
13685c7e-7d7e-11de-9ae2-0019e336be3a	Uganda	UG	RoW Africa
1387ef8a-7d7e-11de-9ae2-0019e336be3a	Ukraine	UA	Ukraine
ce1503be-7060-4959-8387-bc3ea3f4c885	Union for the Co-ordination of Transmission of Electricity	UCTE	Luxembourg	Croatia	Slovenia	Slovakia	Denmark	Hungary	Austria	Sweden	Belgium	Netherlands	Czech Republic	Greece	Bulgaria	Germany	France	Ireland	Italy	Romania	Portugal	Poland	Spain
14f9e5d0-7d7e-11de-9ae2-0019e336be3a	United Arab Emirates	AE	RoW Middle East
13725fee-7d7e-11de-9ae2-0019e336be3a	United Kingdom	GB	United Kingdom
13d387f6-7d7e-11de-9ae2-0019e336be3a	United States	US	United States
10cadb86-7d7e-11de-9ae2-0019e336be3a	United States Minor Outlying Islands	UM	United States
14266b60-7d7e-11de-9ae2-0019e336be3a	Uruguay	UY	RoW America
f557e57c-b331-4ed4-b103-cb9a167c71b0	US Naval Base Guantanamo Bay	Guantanamo Bay	United States
142f54c8-7d7e-11de-9ae2-0019e336be3a	Uzbekistan	UZ	RoW Asia and Pacific
10cf3776-7d7e-11de-9ae2-0019e336be3a	Vanuatu	VU	RoW Asia and Pacific
143d4e2a-7d7e-11de-9ae2-0019e336be3a	Venezuela	VE	RoW America
144e6f5c-7d7e-11de-9ae2-0019e336be3a	Viet Nam	VN	RoW Asia and Pacific
14480004-7d7e-11de-9ae2-0019e336be3a	Virgin Islands, British	VG	RoW America
14599396-7d7e-11de-9ae2-0019e336be3a	Virgin Islands, U.S.	VI	RoW America
14644bba-7d7e-11de-9ae2-0019e336be3a	Wallis and Futuna	WF	RoW Asia and Pacific
e89dc6f4-88d2-11de-99d3-0019e336be3a	Western Africa	UN-WAFRICA	RoW Africa
4ed30b08-88d5-11de-99d3-0019e336be3a	Western Asia	UN-WASIA	RoW Asia and Pacific
3af78f04-f008-43fd-8e29-dccfba3075c7	Western Electricity Coordinating Council	WECC	United States	Canada
f37ced82-5df8-48c2-a207-1e36dd11a112	Western Electricity Coordinating Council, US part only	WECC, US only	United States
de74489a-e3bf-4b3a-8463-b7b9eba8a8fb	Western Europe	WEU	Austria	Belgium	Germany	France	Ireland	Luxembourg	Netherlands	United Kingdom	Switzerland
151bdf00-7d7e-11de-9ae2-0019e336be3a	Western Sahara	EH	RoW Africa
146f1702-7d7e-11de-9ae2-0019e336be3a	Yemen	YE	RoW Middle East
147563fa-7d7e-11de-9ae2-0019e336be3a	Zambia	ZM	RoW Africa
147cde5a-7d7e-11de-9ae2-0019e336be3a	Zimbabwe	ZW	RoW Africa
[truncated: 2 more columns]

## Sheet: 4. Hybrid LCA
	Reference											Services
	Capital											Services + capital
